# Supplementary material for: A novel 3D visualization method in mice identifies the periportal lamellar complex (PLC) as a key regulator of hepatic ductal and neuronal branching morphogenesis
Source: eLife. 2026 May 7;14:RP108669. doi: 10.7554/eLife.108669 (PMC13152276; doi:10.7554/eLife.108669)
Supplement: Figure 1—source data 1. [file elife-108669-fig1-data1.xlsx]

## Sheet: Sheet1
Figure 1 - Source Data 1
Figure 1D: Quantitative analysis of tissue volume changes following each clearing protocol (n = 6 per group). No statistically significant difference was observed between the 25% urea group and the 40% urea + H₂O₂ group. Statistical test: unpaired two-tailed t-test. PT: pre-treatment.
Summary Statistics (arithmetic from GraphPad Prism 7)
Table Analyzed	Data 1
Column F	40%Urea+H2O2
vs.	vs.
Column C	25%Urea
Unpaired t test
P value	0.7576
P value summary	ns
Significantly different (P < 0.05)?	No
One- or two-tailed P value?	Two-tailed
t, df	t=0.3173, df=10
How big is the difference?
Mean of column C	1.134
Mean of column F	1.125
Difference between means (F - C) ± SEM	-0.009024 ± 0.02844
95% confidence interval	-0.07240 to 0.05435
R squared (eta squared)	0.009965
F test to compare variances
F, DFn, Dfd	6.459, 5, 5
P value	0.0615
P value summary	ns
Significantly different (P < 0.05)?	No
Data analyzed
Sample size, column C	6
Sample size, column F	6
	before	after24h
25%Urea	221.398	229.764	1.03779	1.04962
	213.604	231.821	1.08528
	77.242	78.838	1.02066
	87.67	92.343	1.0533
	45.243	49.365	1.09111
	44.367	44.793	1.0096
40%Urea	179.139	219.528	1.22546	1.20914
	169.622	208.67	1.23021
	66.954	84.574	1.26317
	73.527	88.629	1.20539
	33.713	40.216	1.19289
	34.896	39.701	1.13769
25%Urea+PT	192.8	264.093	1.36978	1.35533
	201.927	275.977	1.36672
	74.12	109.433	1.47643
	84.028	114.636	1.36426
	46.054	58.131	1.26224
	35.043	45.295	1.29255
40%Urea+PT	197.561	216.947	1.09813	1.12489
	222.382	246.9	1.11025
	91.358	95.433	1.0446
	91.107	99.463	1.09172
	34.566	42.133	1.21891
	49.55	58.752	1.18571
