# Supplementary material for: A novel 3D visualization method in mice identifies the periportal lamellar complex (PLC) as a key regulator of hepatic ductal and neuronal branching morphogenesis
Source: eLife. 2026 May 7;14:RP108669. doi: 10.7554/eLife.108669 (PMC13152276; doi:10.7554/eLife.108669)
Supplement: Figure 1—source data 2. [file elife-108669-fig1-data2.xlsx]

## Sheet: Sheet1
Figure 1 - Source Data 2
Figure 1E: Transmission spectra (400–900 nm) of 1 mm-thick mouse liver samples after each clearing protocol (n = 5 per group)
Summary Statistics (arithmetic from GraphPad Prism 7)
Table Analyzed	Data 7
Two-way ANOVA	Ordinary
Alpha	0.05
Source of Variation	% of total variation	P value	P value summary	Significant?
Interaction	0.5412	<0.0001	****	Yes
Row Factor	60.09	<0.0001	****	Yes
Column Factor	39.36	<0.0001	****	Yes
ANOVA table	SS	DF	MS	F (DFn, DFd)	P value
Interaction	361.6	25	14.47	F (25, 208) = 464.7	P<0.0001
Row Factor	40148	25	1606	F (25, 208) = 51594	P<0.0001
Column Factor	26301	1	26301	F (1, 208) = 844982	P<0.0001
Residual	6.474	208	0.03113
Difference between column means
Mean of 25%Urea	41.58
Mean of 40%Urea+PT	61.69
Difference between means	-20.12
SE of difference	0.02188
95% CI of difference	-20.16 to -20.07
Data summary
Number of columns (Column Factor)	2
Number of rows (Row Factor)	26
Number of values	260
	25%Urea			25%Urea+PT			40%Urea			40%Urea+PT
400	14	0.115451	5	24	0.102422	5	17	0.119454	5	26	0.090811	5
	17	0.130815	5	29	0.115209	5	21	0.128176	5	32	0.095077	5
	22	0.161611	5	34	0.131216	5	26	0.144573	5	39	0.106889	5
	26	0.186082	5	39	0.14364	5	31	0.154053	5	45	0.115486	5
	30	0.203472	5	43	0.150887	5	36	0.157254	5	49	0.118441	5
500	32	0.2168	5	46	0.155144	5	39	0.157719	5	53	0.117086	5
	35	0.225955	5	49	0.157562	5	42	0.155878	5	56	0.115446	5
	37	0.232032	5	51	0.158834	5	45	0.152145	5	58	0.11426	5
	38	0.237143	5	53	0.158214	5	47	0.147112	5	60	0.112441	5
	40	0.240876	5	54	0.157236	5	49	0.14269	5	62	0.108973	5
600	41	0.243738	5	56	0.155773	5	51	0.139222	5	64	0.105832	5
	43	0.246197	5	57	0.154444	5	52	0.133024	5	65	0.105481	5
	44	0.248215	5	58	0.152921	5	54	0.129313	5	66	0.105232	5
	46	0.250548	5	59	0.152611	5	55	0.124553	5	67	0.104869	5
	47	0.251794	5	60	0.151305	5	56	0.120026	5	69	0.103169	5
700	48	0.252106	5	61	0.148887	5	58	0.115397	5	69	0.100202	5
	49	0.251421	5	62	0.147135	5	58	0.113665	5	70	0.096359	5
	50	0.250636	5	63	0.143743	5	59	0.108768	5	71	0.093494	5
	50	0.249302	5	63	0.142505	5	60	0.106756	5	72	0.089386	5
	51	0.247169	5	64	0.141103	5	61	0.104199	5	72	0.086306	5
800	52	0.245216	5	65	0.139444	5	62	0.100839	5	73	0.084396	5
	53	0.242759	5	65	0.141849	5	63	0.100763	5	73	0.079436	5
	53	0.240275	5	66	0.137642	5	63	0.0947383	5	73	0.082569	5
	54	0.237149	5	66	0.135798	5	63	0.0914279	5	73	0.082631	5
	54	0.233303	5	66	0.137658	5	64	0.0952409	5	73	0.075768	5
900	55	0.230401	5	67	0.133012	5	64	0.0854742	5	74	0.081033	5
