# Supplementary material for: A novel 3D visualization method in mice identifies the periportal lamellar complex (PLC) as a key regulator of hepatic ductal and neuronal branching morphogenesis
Source: eLife. 2026 May 7;14:RP108669. doi: 10.7554/eLife.108669 (PMC13152276; doi:10.7554/eLife.108669)
Supplement: Figure 2—figure supplement 1—source data 1. [file elife-108669-fig2-figsupp1-data1.xlsx]

## Sheet: Sheet1
Figure 2—figure supplement 1-source data 1
related to Figure 2-figure supplement 1K: Distribution of the number of periportal lamellar complex (PLC) structures along portal vein trunks with lengths ranging from 269.85 μm to 1513.67 μm. Each value represents the number of PLCs embedded along portal veins of a given length.
Summary Statistics (arithmetic from GraphPad Prism 7)
PV length(µm)	number of PLC
1492.32	2
987.77		3
878.66			2
1513.67				4
858.34						2
769.89							1
580.98								2
756.18									2
587.34										3
269.85												2
315.15													2
1027.21															3
636.76																2
769.13																	2
637.92																			2
593.67																				1
1014.9																					2
858.92																						2
733.9																							2
