# Supplementary material for: A novel 3D visualization method in mice identifies the periportal lamellar complex (PLC) as a key regulator of hepatic ductal and neuronal branching morphogenesis
Source: eLife. 2026 May 7;14:RP108669. doi: 10.7554/eLife.108669 (PMC13152276; doi:10.7554/eLife.108669)
Supplement: Figure 2—figure supplement 1—source data 2. [file elife-108669-fig2-figsupp1-data2.xlsx]

## Sheet: Sheet1
Figure 2—figure supplement 1-source data 2
related to Figure 2-figure supplement 1L: Distribution of the total PLC area along portal vein trunks with lengths ranging from 269.85 μm to 1513.67 μm. Each value represents the cumulative area of PLC structures associated with portal veins of a given length.
Summary Statistics (arithmetic from GraphPad Prism 7)
PV length(µm)	Area of PLC（μm2）
1492.32	13990.2
987.77		9301.4
878.66			10083.5
1513.67				14722.8
858.34						12197.1
769.89							10880.9
580.98								9881.31
756.18									12597.2
587.34										13719.4
269.85												3141.99
315.15													1869.45
1027.21															24230.2
636.76																35473.5
769.13																	23009.3
637.92																			18221.3
593.67																				21944.9
1014.9																					36393
858.92																						32669.3
733.9																							26179.7
