# Supplementary material for: A novel 3D visualization method in mice identifies the periportal lamellar complex (PLC) as a key regulator of hepatic ductal and neuronal branching morphogenesis
Source: eLife. 2026 May 7;14:RP108669. doi: 10.7554/eLife.108669 (PMC13152276; doi:10.7554/eLife.108669)
Supplement: Figure 2—source data 1. [file elife-108669-fig2-data1.xlsx]

## Sheet: Sheet1
Figure 2- Source Data 1
Figure 2J: Fluorescence intensity profile plots. The X-axis represents the scan distance (0–400 μm), and the Y-axis represents fluorescence intensity. Both portal vein (green) and hepatic artery (pink) signals showed significant increases within the PLC region. The regions were defined as follows: 0–100 μm, portal vein region; 100–250 μm, PLC region; 250–400 μm, liver sinusoid region (n = 5 per g…
Summary Statistics (arithmetic from GraphPad Prism 7)
distance(μm)	Hepatic artery(intensity)					Potral vein(intensity)
0						7.11113	7.3333	4.7778	4.44443	1.33333
0.322						8.1272	5.6674	4.18667	2.8714	0.883367
0.643						8.15103	5.21287	3.98997	2.75747	3.53057
0.965						7.86973	5.0802	3.61293	3.23847	4.7879
1.286						7.71273	4.94093	2.81677	2.81777	5.96203
1.608						8.5101	4.698	1.1504	1.8806	5.5323
1.929						6.15513	4.51593	0.360733	1.49353	3.78543
2.251						4.29333	4.1503	0.892367	1.1822	3.78067
2.572						4.1713	4.6835	2.406	1.81973	3.98663
2.894						4.42643	5.61393	4.10017	2.6469	3.17113
3.215						6.4708	5.85377	2.49573	2.3208	4.69013
3.537						8.05073	5.6786	0.192367	2.70763	2.43493
3.859						5.9619	5.42637	0.389467	7.01793	2.7892
4.18						5.81583	5.2581	0.902367	8.582	3.2221
4.502						5.79897	5.54233	1.28853	8.62243	3.3498
4.823						5.4935	5.86213	2.70177	6.94567	3.2032
5.145						5.76187	7.58843	4.33043	8.16293	3.31103
5.466						5.69947	10.2626	6.99547	9.86977	2.77593
5.788						4.2888	11.8178	6.63647	8.7983	2.7651
6.109						2.6913	11.4395	7.57997	10.407	3.9994
6.431						2.50203	10.6852	8.84647	9.16157	4.9574
6.752						2.33253	10.7029	9.4846	7.5641	6.38113
7.074						1.9239	9.707	10.2297	7.19877	5.6262
7.395						2.74047	8.65717	10.834	7.8354	2.9854
7.717						2.46783	8.6041	10.8718	7.68783	2.40797
8.039						1.917	8.74443	12.8387	5.68243	2.22663
8.36						1.80053	8.4427	16.6007	6.3522	2.32367
8.682						2.18833	8.035	18.5655	6.4607	3.045
9.003						2.27723	9.6689	21.5123	6.98737	1.55863
9.325						2.32393	11.1832	21.216	9.1862	2.26447
9.646						2.49903	10.9244	25.7347	9.3843	3.02017
9.968						2.7886	9.39727	23.9962	8.2891	4.97933
10.289						3.6081	9.00823	14.9075	6.7757	6.9478
10.611						6.18283	9.17473	11.8701	7.804	6.79363
10.932						9.49703	9.44877	10.2383	8.1665	3.86873
11.254						4.4235	9.51807	9.69577	8.84777	3.37817
11.576						4.2676	10.2845	9.21883	10.6037	2.3509
11.897						4.268	12.6355	11.0853	8.94997	1.79013
12.219						4.4695	12.0683	12.3585	5.22	2.36137
12.54						4.8065	10.6373	11.4364	4.10363	2.44753
12.862						4.60553	9.7079	9.68323	5.66883	3.43933
13.183						5.2632	10.5639	10.6438	5.11833	3.47853
13.505						5.0433	11.4298	13.3038	3.09533	2.9599
13.826						4.23707	10.5694	11.6809	2.6609	2.80753
14.148						3.63333	10.3667	8.38223	2.34347	2.8451
14.469						3.6313	8.38067	7.60473	1.8979	1.93417
14.791						3.98657	7.19023	7.87247	1.8953	2.38993
15.113						3.5083	7.11257	7.47623	4.68513	2.73577
15.434						3.74603	7.7349	7.2602	5.01643	4.41923
15.756						4.38757	8.18447	7.23797	3.57913	7.01637
16.077						4.21843	9.1941	6.57027	3.84047	7.5702
16.399						3.85723	9.99257	6.542	3.1003	7.35727
16.72						2.79487	9.77457	5.76357	2.0867	4.1739
17.042						2.4442	10.5054	4.90987	1.24433	2.48547
17.363						2.4052	10.3952	5.0647	1.209	2.84727
17.685						1.35607	9.2226	6.07647	1.36353	2.59413
18.006						0.804967	8.47657	8.55227	1.8871	2.8185
18.328						0.841067	8.28833	9.16307	2.45883	3.836
18.65						1.41033	8.15387	10.3627	2.92717	4.41617
18.971						1.95877	8.37307	7.14147	2.69113	3.7127
19.293						1.71007	7.64433	6.34067	1.77373	3.18837
19.614						2.0304	6.8041	7.12113	1.6524	3.317
19.936						2.08487	3.8091	7.3559	3.0668	4.6987
20.257						2.54007	3.69423	7.63603	3.75797	5.06287
20.579						3.5679	3.49637	5.994	3.6092	3.69957
20.9						4.7902	3.382	5.43837	2.8014	4.74097
21.222						4.27613	3.30077	5.53843	3.57603	4.7771
21.543						2.8133	3.78493	6.00107	3.01153	3.95327
21.865						2.10073	2.78013	6.97757	4.14877	4.5607
22.186						1.89637	0.960833	7.28187	7.53187	5.89157
22.508						1.5517	1.55283	6.7764	12.5931	5.49903
22.83						1.80303	2.74863	7.17963	7.27957	4.63463
23.151						2.25207	2.0825	8.66943	5.07847	4.5673
23.473						2.09727	1.21953	9.6471	4.22623	4.439
23.794						3.24323	1.66157	12.6584	3.33877	5.47943
24.116						5.4956	0.930933	9.9404	2.99597	6.84233
24.437						4.33527	0.699467	8.81037	3.61767	6.56057
24.759						2.71683	1.13827	8.57523	5.29357	6.0917
25.08						2.90007	0.844667	9.1903	6.98317	5.49767
25.402						2.60103	1.31787	10.5182	5.7657	5.6522
25.723						2.0224	1.27607	10.5419	3.73733	6.48797
26.045						2.30097	1.99737	9.4919	2.62307	6.73463
26.367						2.694	3.33097	12.4383	2.49117	6.1298
26.688						2.14527	1.93693	12.6478	2.14527	6.31773
27.01						1.63727	1.16073	12.4222	1.78787	7.37643
27.331						2.54397	1.23563	14.2868	1.89223	9.32737
27.653						1.83513	1.0075	12.935	3.03117	11.4147
27.974						1.48393	0.8683	11.4117	4.22817	12.4249
28.296						1.8315	0.883167	12.5307	5.66943	12.612
28.617						1.92813	0.984233	11.3166	6.6116	12.1872
28.939						2.2713	1.19543	10.3419	10.2713	11.9342
29.26						2.64517	1.61783	8.69917	8.34543	11.7872
29.582						2.49177	1.40907	6.94977	7.0143	12.6904
29.904						2.50103	1.75797	7.92303	6.05877	12.4424
30.225						2.4914	2.22397	10.1474	3.5905	11.2091
30.547						1.86317	2.9182	9.34587	3.05723	10.1461
30.868						2.12177	2.85013	7.16307	5.07407	9.79407
31.19						2.25643	2.88173	7.93107	2.7368	9.9285
31.511						1.35973	3.9953	9.91083	1.78673	9.51303
31.833						2.68193	4.45547	7.8873	1.33797	8.2957
32.154						3.87477	5.1558	6.15587	1.3306	8.56247
32.476						2.31847	7.18353	3.55687	0.792367	8.7523
32.797						1.1506	8.36667	1.86087	0.232333	8.15527
33.119						1.41143	6.5782	1.19033	0.210933	8.81897
33.441						2.04783	4.3509	1.65083	0.472567	9.92787
33.762						2.52733	3.41233	0.553	0.508467	9.83887
34.084						1.75713	2.12063	0.613433	0.192867	9.19107
34.405						2.32027	1.2076	0.7316	0.3302	8.80927
34.727						3.1363	0.8423	0.840833	0.3377	8.8239
35.048						4.1937	0.528867	1.54887	1.05333	9.32987
35.37						3.73673	0.5893	3.3026	2.4865	9.35853
35.691						3.21317	0.8429	3.40507	1.55947	10.4668
36.013						4.8995	1.0763	2.37217	1.3551	11.3543
36.334						7.58707	0.921533	1.43893	1.93883	11.6589
36.656						5.65293	0.910833	1.0523	1.74063	11.7276
36.977						5.13833	1.14747	0.390567	2.62077	11.859
37.299						4.03857	1.20963	0.601767	3.70893	12.274
37.621						2.8491	1.44567	0.198533	3.5465	12.3798
37.942						2.1307	0.758167	0.459633	3.14503	12.266
38.264						1.6025	0.978967	0.483267	3.87283	9.08547
38.585						1.3698	1.19037	0.100267	2.70297	7.86407
38.907						1.92523	2.9983	0.3436	2.0966	7.49597
39.228						3.76153	3.31557	0.077833	1.83607	7.83577
39.55						4.38333	2.12777	0	1.49623	8.14503
39.871						2.8487	1.47193	0.029567	3.03317	7.298
40.193						3.90123	1.34637	1.25287	3.87687	6.93877
40.514						5.97277	2.0246	4.4867	2.7611	7.1046
40.836						8.0135	1.69797	3.6712	2.07393	8.2013
41.158						7.65153	2.0196	1.91073	1.38927	9.19037
41.479						3.0129	3.00657	1.1541	2.11303	10.06
41.801						2.8967	3.8001	1.4517	3.17057	11.8267
42.122						5.63373	3.07167	2.29403	2.68393	11.4045
42.444						6.47457	2.79827	3.54497	3.56537	11.6381
42.765						5.17387	2.19883	5.88827	3.32947	12.7777
43.087						4.64647	1.72063	5.34773	4.67773	13.5365
43.408						4.95383	1.48387	4.8882	7.37777	13.8038
43.73						4.46273	1.61967	3.73583	7.87153	13.0692
44.051						4.40937	2.2788	2.95307	5.81657	13.2028
44.373						5.62	1.5804	3.20777	4.52883	14.6885
44.695						8.38617	0.855067	1.97063	4.315	16.8109
45.016						10.065	0.7285	1.03577	4.8127	14.9154
45.338						6.8242	0.548933	1.15913	4.86797	11.2106
45.659						4.83153	0.985333	1.62043	4.15277	10.7342
45.981						4.586	1.5744	3.62037	4.7522	11.8561
46.302						5.25623	1.56293	3.2529	4.78657	12.0021
46.624						5.99623	2.11243	1.39683	5.02873	13.116
46.945						7.41883	2.2921	1.24863	6.54303	14.1367
47.267						7.2544	1.73413	2.52067	6.867	15.5946
47.588						6.6068	1.7109	2.88593	4.78943	17.6073
47.91						6.01323	1.86833	1.75253	4.55743	18.906
48.232						5.58057	1.45713	0.3808	4.30017	16.9788
48.553						8.9649	1.0371	0.195367	4.92783	16.6336
48.875						7.3873	0.889	0.240967	7.76637	16.6288
49.196						4.7362	0.9923	0.063933	7.65047	16.1268
49.518						3.9647	1.4108	0.173067	5.24667	16.3285
49.839						3.79383	3.106	0.2509	5.35407	17.9028
50.161						3.38253	1.76283	0.7249	5.96283	19.4764
50.482						3.2771	1.4572	3.26887	4.68567	20.8504
50.804						3.21267	2.1187	5.14787	4.58207	22.1896
51.125						2.9733	2.51367	3.88077	5.0357	23.2059
51.447						2.50507	2.6827	2.02093	4.9312	23.6231
51.768						2.07743	1.45147	1.67087	4.51917	23.7964
52.09						1.98203	0.6932	3.12157	5.57977	23.4393
52.412						2.16523	0.6025	4.09183	7.00087	23.2943
52.733						2.35307	0.465767	6.05407	6.5658	22.2529
53.055						2.62603	0.9229	5.315	5.80267	21.6871
53.376						2.39727	1.6968	2.40717	6.61093	23.286
53.698						1.66703	1.42893	0	6.0694	19.647
54.019						1.7929	1.1456	0	6.336	17.4508
54.341						1.7548	1.10247	0.075133	7.55343	14.735
54.662						1.3296	1.14803	0.197333	9.8473	12.5793
54.984						1.01797	1.5687	0.017633	8.1086	10.8685
55.305						0.966933	2.36867	0.042	8.18047	9.13193
55.627						1.49913	0.927	0.138667	9.80803	8.1989
55.949						1.61133	0.4779	0.338833	9.4649	7.9614
56.27						1.37823	0	0.861433	9.3604	8.0249
56.592						1.55487	0	2.05123	9.92943	8.06907
56.913						2.69767	0.061667	0.933067	10.6164	7.51113
57.235						4.43323	0.0684	0.851067	11.1038	7.44827
57.556						1.86123	0	0.690333	10.1201	7.88243
57.878						0.988233	0.645533	0.743167	10.62	8.12973
58.199						0.941367	0.127633	1.22	10.866	7.95183
58.521						0.823733	0.4257	0.673167	10.6989	8.1431
58.842						0.5761	0.660433	0.3017	10.9938	8.31263
59.164						0.758633	0.346233	0.379533	12.4323	9.2723
59.486						1.81387	0	0.089267	13.9688	10.5388
59.807						2.27263	0.082733	0.301	12.9818	10.959
60.129						1.08017	0.742767	0.706	11.6476	12.7005
60.45						0.935533	0.355567	0.838533	11.5832	11.3516
60.772						1.1053	0.094967	0.733867	11.7444	11.5508
61.093						1.06377	0.017933	0.782267	12.2111	11.3254
61.415						1.1609	0	3.27667	10.5151	11.3469
61.736						1.01537	0	4.9404	9.84537	12.2018
62.058						0.8582	0	2.7064	14.3101	13.9817
62.379						0.9659	0.2874	2.12727	11.8423	16.3508
62.701						1.3905	0.149133	1.22447	10.3504	18.1853
63.023						1.48933	0.047633	0.946167	10.0588	20.27
63.344						1.78757	0	1.21293	9.9312	21.7775
63.666						1.91537	0.059733	1.10797	11.0307	23.0278
63.987						0.948967	1.10507	0.198733	11.6159	23.2114
64.309						0.589833	1.9712	0.061733	10.7376	22.4272
64.63						1.15207	2.44303	0.1502	10.9095	21.0139
64.952						1.20157	3.19557	0.370433	10.3756	19.8915
65.273						1.00913	5.08577	0.566367	9.5229	19.0787
65.595						0.888667	3.78417	1.24307	10.2593	17.789
65.916						1.0234	1.9371	2.47777	9.84447	16.1163
66.238						1.3445	2.46227	2.21443	10.2464	14.5458
66.559						0.9544	4.10063	1.209	9.9385	13.1258
66.881						1.0119	5.09257	1.51207	10.0224	12.8178
67.203						0.8375	4.93187	1.7581	9.77707	12.2306
67.524						1.03047	8.78943	1.90503	9.7308	12.1438
67.846						1.381	3.75987	2.30593	9.5128	12.1307
68.167						0.806467	3.43803	1.83417	9.12783	12.025
68.489						1.00743	2.6335	1.10153	8.87393	12.1598
68.81						1.10127	3.48547	2.6879	9.12167	11.6516
69.132						1.6422	5.55033	5.69043	9.4487	12.3816
69.453						1.65503	5.26417	7.35657	10.7357	12.997
69.775						1.58227	4.30257	3.85623	9.36677	12.8014
70.096						1.16247	3.18033	1.89267	8.75897	12.6787
70.418						1.11137	2.50883	1.09263	8.7061	13.1468
70.74						1.46897	1.83857	0.84	8.11303	14.038
71.061						1.33247	0.976233	0.976733	7.50207	14.5836
71.383						1.76217	1.3472	1.1962	7.70237	13.8317
71.704						1.89787	2.64713	1.11593	6.50617	13.1762
72.026						1.09633	1.69467	0.175867	6.06243	13.9657
72.347						1.7437	0.8957	0.0179	5.9535	12.4027
72.669						1.45073	0.594067	0.4245	6.3191	12.1581
72.99						1.53537	0.719767	1.1379	5.98813	12.0229
73.312						2.20183	0.370133	0.9276	5.53283	12.987
73.633						2.3147	0.040833	1.08197	4.69387	12.6699
73.955						1.84517	0.0081	1.93823	4.77627	12.9096
74.277						2.24563	0	2.08383	5.72573	12.0862
74.598						2.1715	0.141967	0.954233	6.73427	10.9696
74.92						1.70417	1.4288	0.495433	5.99513	10.304
75.241						2.23993	0.146167	0.441867	5.2596	9.9404
75.563						2.91977	0.026567	0.6586	5.0718	9.6717
75.884						2.23257	0.008167	1.17067	5.70307	9.6152
76.206						3.40183	0	1.85547	5.8856	9.61973
76.527						2.81017	0.358433	1.25603	6.03687	9.03643
76.849						1.5108	0.8148	0.662967	4.47757	9.25667
77.17						1.66143	1.27117	0.194567	5.58193	10.4163
77.492						2.59733	1.79487	0.191467	8.64973	11.8602
77.814						3.84783	0.615867	0.556633	6.85197	12.456
78.135						4.03103	0.237167	0.7326	5.48817	12.5677
78.457						2.569	0.690067	0.773667	5.77237	12.7363
78.778						1.03433	0.336833	3.5975	6.2309	13.1052
79.1						0.916433	0.0116	4.21427	6.14833	11.8882
79.421						1.4476	0.061567	2.57533	5.95263	10.2572
79.743						1.26873	0.254067	0.8106	5.58013	9.6426
80.064						1.89027	0.3484	0.641833	5.67633	10.3214
80.386						1.57677	0.0492	0.694067	5.7647	9.56357
80.707						1.51943	0.258067	1.22227	5.2485	8.51313
81.029						1.8834	0.5541	5.47597	3.2465	7.41763
81.35						1.7976	0.739167	13.7949	3.08257	6.76077
81.672						1.454	0	8.4691	2.87517	6.56823
81.994						1.98213	0.1298	4.61873	2.2087	5.94557
82.315						3.11803	0.270333	5.4461	0.729	4.25747
82.637						2.57007	0.222367	5.80513	0.059933	2.70067
82.958						1.48527	0	4.45367	0	1.8909
83.28						1.7	0.411767	3.4543	0	1.7627
83.601						2.71913	0.1695	4.00163	0.0004	2.0892
83.923						2.4596	0	2.35607	0.0671	1.45597
84.244						2.09107	0.0899	1.6732	0.0704	1.36103
84.566						2.26873	1.7936	1.47123	0.100467	1.5041
84.887						2.62317	4.2178	2.25007	0.173033	1.64133
85.209						3.0576	1.6022	3.4795	0.1178	1.59767
85.531						4.0633	0.019333	4.30313	0.038467	1.68873
85.852						5.45893	0.1092	5.1236	0	1.6741
86.174						5.5884	0.934733	6.61003	0.055933	1.72193
86.495						5.56967	3.2143	7.45597	0.200233	1.71843
86.817						5.91327	1.32487	7.46803	1.30923	1.8691
87.138						7.8632	0.733867	8.2091	1.14623	1.47973
87.46						8.99017	1.50063	8.386	1.7479	2.36197
87.781						9.1984	2.2702	5.2166	3.16913	3.33503
88.103						8.9795	2.99237	3.95	4.72327	3.6686
88.424						8.29577	3.61073	2.91267	4.018	4.3917
88.746						7.89787	3.53957	2.16947	3.55753	3.70767
89.068						7.65713	2.52823	1.54873	4.1838	2.6751
89.389						7.30717	2.56163	1.1404	5.49587	2.46333
89.711						8.1813	3.34157	0.774267	5.55873	3.15377
90.032						9.98253	3.05657	0.077433	4.11633	5.304
90.354						10.2314	4.3614	0	4.343	6.3892
90.675						12.4065	4.9781	0.6438	5.4887	5.76677
90.997						10.8777	3.0139	1.74817	6.9912	5.3305
91.318						9.65887	2.45233	0	10.0451	5.72477
91.64						9.43867	2.8431	0	13.1339	4.91093
91.961						10.4652	2.28153	0	12.2935	6.26507
92.283						11.0591	1.40867	0.312567	11.3317	3.56263
92.604						10.8629	0.456233	1.2134	12.1718	2.86523
92.926						10.1858	0	0	12.4393	3.66223
93.248						8.17653	0	0.028067	11.0743	3.5688
93.569						6.74087	0.037433	0.610333	9.56143	3.04147
93.891						5.43463	0.6993	1.65	9.1127	2.8387
94.212						4.78293	1.01043	4.1519	9.39983	2.50367
94.534						6.56173	2.34197	7.07717	9.95043	2.60937
94.855						16.1339	4.2154	8.3749	11.3352	2.64423
95.177						10.1057	2.0989	8.4556	12.1639	3.18387
95.498						5.60197	0.2787	8.5637	12.7089	3.654
95.82						3.8146	0	8.20233	12.6113	3.45703
96.141						3.19503	0.028867	7.8135	10.2081	2.9751
96.463						2.48037	0.073333	5.06197	7.8033	2.71507
96.785						2.48183	0	3.0709	6.09433	2.51597
97.106						3.42603	0.0101	1.75273	5.0181	3.08497
97.428						6.26403	0.055967	2.05373	4.7889	3.38717
97.749						4.90183	0.348033	4.74247	6.03807	3.542
98.071						3.95107	0.745	5.1906	5.70367	3.46703
98.392						3.37487	1.35807	7.4596	5.21803	3.75887
98.714						2.95373	1.4642	5.71333	4.68077	4.92473
99.035						3.1209	0.549	4.5039	4.3133	6.39163
99.357						4.5783	0.257833	4.5058	3.27953	6.47013
99.678						6.6308	0.283933	5.55297	2.14377	5.42773
100	36.4444	4.2222	3.22223	13.4444	26.5555	5.7735	1.08383	5.9517	1.56003	5.5394
100.322	34.0288	3.91613	3.13453	10.8257	29.2897	4.02573	1.07063	5.39003	1.26737	5.44133
100.643	37.3184	3.31843	3.2682	9.1246	30.3139	5.16183	1.0761	6.47483	1.2842	5.76573
100.965	40.5922	2.7801	5.64257	8.38577	30.1306	5.75873	1.0935	5.7799	1.86753	5.97517
101.286	39.0087	2.4707	6.52277	7.4958	30.7894	4.10517	1.7662	5.30053	2.272	5.12283
101.608	34.3646	2.19703	3.7087	9.14613	32.7509	4.4614	3.21343	5.18333	2.57247	5.34347
101.929	30.3871	1.69073	2.5897	8.65537	34.1315	5.16097	4.2809	3.6457	2.13107	5.85963
102.251	27.952	1.99003	4.26663	8.2755	34.974	4.83343	6.8857	3.17847	2.33213	6.5945
102.572	23.2228	2.78853	5.1175	9.79507	37.7658	5.71487	5.46353	2.0329	2.2055	6.6106
102.894	20.0449	2.09687	5.084	11.0016	41.9534	8.59193	3.625	1.9282	2.18433	5.887
103.215	21.7271	1.9028	4.83813	8.98383	41.2889	8.0264	3.48623	1.49063	2.20393	5.87127
103.537	26.2569	1.97743	5.7801	9.53293	39.5408	7.41723	3.9842	0.776967	2.05867	6.12177
103.859	27.4405	1.80287	5.59937	10.0932	38.4734	6.83217	3.6371	0.2581	2.80577	6.59443
104.18	24.153	2.447	5.0078	11.3669	36.167	4.85767	2.86483	0.0037	3.6892	7.43477
104.502	21.8714	2.6495	6.42017	13.0409	31.2957	3.51657	2.98113	0.016067	6.65567	7.33083
104.823	20.6133	3.3656	5.87857	18.3785	26.8871	3.83447	2.8912	0.357833	11.7942	6.908
105.145	20.2971	3.84717	4.37153	22.3663	24.0738	6.53187	2.01187	0.8005	12.3632	6.12903
105.466	19.5767	5.45857	6.0359	21.2828	22.9379	6.0017	1.8267	1.0876	9.6589	7.13417
105.788	17.0918	6.9176	10.1959	16.9465	24.0686	3.31033	1.9689	1.01483	7.84337	6.1547
106.109	14.2926	6.38737	9.8996	14.9002	26.8826	2.47917	1.19053	1.50657	8.58697	6.539
106.431	13.5328	5.5066	6.58607	14.4916	28.3173	2.86977	0.981133	3.6655	9.0561	6.10763
106.752	13.4392	3.4924	5.91763	14.2469	27.3484	3.378	1.17133	5.9202	10.0142	5.1605
107.074	14.1048	2.83363	7.62133	13.0233	27.0637	3.17323	2.3424	7.086	10.5605	4.86493
107.396	12.8025	3.34267	8.46247	12.267	27.497	2.71877	2.6467	10.7544	11.2692	4.3299
107.717	12.8433	4.50137	11.2355	13.1842	27.2514	2.65363	2.39157	6.59407	10.8546	4.44747
108.039	12.3721	4.5957	9.73723	14.3103	26.7669	2.34423	2.4083	0.7298	10.9931	4.94903
108.36	12.3411	4.3734	10.5451	17.0973	26.8048	1.9676	1.94553	0.345267	12.4935	5.57523
108.682	13.0893	4.73017	8.6585	17.826	26.5153	1.8518	2.40833	0.152733	12.2205	4.8736
109.003	12.9789	4.32343	6.99887	17.5996	27.6948	2.27713	1.33133	0.3121	12.6692	4.44287
109.325	12.0371	3.93463	6.76777	17.1674	28.1334	2.79853	1.38853	0.664033	14.4906	4.37073
109.646	11.6385	4.1415	9.73233	18.6575	29.2384	5.60083	1.31453	0.7019	18.4811	4.07283
109.968	12.43	5.24807	12.2058	16.3446	33.1676	6.53717	0.852367	0.8608	13.8203	5.6274
110.289	12.4088	5.64463	11.9315	12.8755	35.0695	4.25833	1.2621	1.88877	10.9983	6.67147
110.611	11.7755	3.72	11.4677	9.2447	35.2011	3.56277	2.01737	1.122	9.4972	7.13133
110.932	10.6313	3.93533	11.0313	8.61133	33.6698	3.0974	1.66557	0.9292	8.11503	7.47363
111.254	9.91857	3.41797	12.4198	7.93767	33.7101	2.1366	1.18963	0.578933	8.0805	7.8297
111.576	9.7437	5.62953	19.4324	8.55153	35.693	1.77887	1.2885	1.04313	8.91093	7.3786
111.897	9.4157	8.51873	21.4246	9.18953	34.1542	1.85257	2.0918	2.35983	9.0469	6.56683
112.219	9.24147	8.782	17.7833	7.8567	35.585	1.9369	2.14993	1.90413	7.92733	6.62477
112.54	9.10907	7.1074	13.2421	6.15673	38.3084	2.3849	2.90623	1.9083	7.11737	7.05557
112.862	8.89637	5.49413	8.68173	6.79907	43.2769	2.93123	3.05647	1.45317	6.99257	6.5241
113.183	9.2046	5.3977	6.30847	7.4797	47.6189	2.6298	3.0108	1.0394	6.89273	7.2402
113.505	11.4219	8.09677	6.20653	6.86063	49.4147	1.9319	3.62457	0.5663	5.6952	9.01617
113.826	11.0138	12.705	6.12997	5.7761	49.4387	1.35223	5.05657	1.02617	4.27893	10.5726
114.148	9.11097	15.7195	7.5198	6.05757	49.0147	2.91703	6.14973	3.66467	4.2208	9.22533
114.469	9.69983	14.8707	9.03553	5.5106	49.572	4.15767	5.43753	5.94687	4.8405	8.29187
114.791	10.9567	12.5112	9.5757	4.83537	50.3227	2.84303	4.7894	3.22343	4.3964	7.94463
115.113	11.3863	12.4301	11.9632	4.39253	49.2238	0.824733	3.65387	2.9016	3.8105	7.39297
115.434	11.2021	12.2351	13.4901	3.6796	45.4475	0.723567	3.55313	5.92907	4.38803	8.8171
115.756	11.0365	15.9303	16.7392	3.2672	43.4398	1.2513	2.86527	9.22913	3.82813	10.9999
116.077	14.0544	18.8895	21.9496	3.26997	42.9928	1.44833	1.71243	10.3012	2.87527	8.7029
116.399	17.8175	18.4303	25.5433	4.4838	45.2451	2.32237	1.4087	7.71757	2.43063	4.71093
116.72	20.3491	18.4148	26.4633	5.1086	44.7691	2.29683	0.766767	6.98067	2.1617	3.37347
117.042	18.6292	16.6637	25.9524	4.50993	41.6722	4.5261	0.499667	6.40247	2.22173	2.68157
117.363	18.4724	12.1917	22.6504	4.4583	40.1618	2.32107	0.2418	7.76253	1.78697	2.53863
117.685	20.235	9.78867	20.5807	4.5493	40.2398	2.8012	0.585833	8.2547	1.78793	1.9285
118.006	19.8965	12.5379	20.3099	4.3852	41.6418	4.05217	0.566767	6.22463	2.11997	1.3534
118.328	19.0824	17.0811	20.5756	4.6107	41.4741	4.4116	0.304567	4.9636	1.8122	1.15543
118.65	16.3782	15.3117	22.4645	4.2464	42.7777	4.25947	0.705633	3.71707	2.3175	0.9612
118.971	15.7796	15.0446	25.2291	3.63377	43.768	5.24463	1.80527	2.34117	2.56837	0.889633
119.293	15.2205	17.1176	24.4421	2.771	46.8599	4.9399	2.62523	1.67827	3.15003	1.3393
119.614	14.5018	18.2553	24.392	2.41487	53.5594	4.38853	2.68253	1.70543	2.65133	2.35137
119.936	13.4366	16.9065	25.7946	2.7942	57.4353	6.4343	1.86423	1.5239	2.16963	2.8463
120.257	12.3709	14.9134	26.3014	3.5755	52.3362	6.39283	4.37973	2.90923	2.02237	3.0583
120.579	11.4787	13.5558	26.1458	3.99717	47.1333	5.258	3.36577	1.1735	2.19287	3.76727
120.9	10.2698	14.2472	25.8506	4.5323	44.1004	4.3708	3.2545	0.1643	2.46533	4.69453
121.222	9.47147	17.7321	26.5745	5.84903	40.3611	3.88753	4.1721	0.0309	2.0153	5.2671
121.543	10.0173	24.955	26.9207	7.75003	35.9302	3.66227	2.5098	0.032467	1.68327	7.28517
121.865	11.6801	33.845	28.5148	7.3484	32.38	3.68817	1.20513	0	2.1863	9.07217
122.186	11.3453	34.5192	31.7549	5.0585	29.5957	4.71947	0.8583	0	3.1574	9.90403
122.508	11.2142	27.959	35.9866	4.1825	27.9799	5.60757	0.528167	0.001933	1.73707	12.3052
122.83	11.6513	20.9085	37.7732	4.49087	26.9583	5.9936	0.599367	0.775267	1.35387	14.6457
123.151	11.8086	23.0048	40.4741	5.56177	26.976	5.0633	1.06777	0.8892	1.19507	15.9193
123.473	11.5536	29.6056	41.4998	7.50977	29.7637	4.35983	1.1227	0.180933	1.46757	16.8919
123.794	11.641	35.6122	41.8589	10.3829	34.7198	4.54503	1.61137	0.063233	2.0883	18.0283
124.116	12.2258	35.0582	41.3523	13.4566	37.2389	6.67883	1.4531	0.318867	1.56297	19.4439
124.437	12.5918	31.0171	40.4402	15.9304	35.4995	6.89983	1.26767	0.7604	1.95767	21.5515
124.759	13.2516	27.74	39.7117	18.6662	33.2529	5.85707	1.31087	0.769467	2.28927	23.4829
125.08	11.7992	27.0497	40.669	19.2788	32.2683	4.12113	1.60093	0.421633	3.4508	22.5565
125.402	9.08177	28.1451	39.3555	20.3769	31.1631	5.7388	2.0028	0	5.20467	20.8678
125.723	7.87823	25.8445	35.737	23.9509	30.8228	7.37003	2.37873	0.2559	7.14633	19.885
126.045	7.62827	18.2074	33.3904	24.0543	33.7574	8.57987	1.96447	1.00053	7.40717	17.8661
126.367	11.9486	13.8736	33.0371	17.5142	32.054	7.47833	1.58867	2.85273	7.07783	15.6881
126.688	14.2923	15.1685	34.8311	20.1788	25.8446	7.63933	1.63393	4.3665	7.2657	13.4997
127.01	15.1045	15.4176	36.5443	21.6748	26.8374	8.4042	2.30517	3.78943	8.9945	11.4539
127.331	16.9541	15.5532	35.4348	20.8299	30.9848	6.68987	3.00617	3.56257	11.6494	10.2321
127.653	18.1378	18.0112	31.965	21.7493	30.5845	6.74483	2.68707	4.19773	14.1552	9.6322
127.974	17.3849	21.3955	27.8015	25.8312	28.6953	8.2358	4.15137	3.77227	16.3702	9.62143
128.296	15.2539	21.7229	24.7882	21.4267	28.8419	7.4588	2.613	6.47783	18.1098	9.10427
128.617	13.4576	21.2792	24.2083	18.85	30.255	7.47	2.38037	6.3168	16.3665	9.3986
128.939	12.2222	22.8239	22.4214	19.4499	31.8077	9.672	2.04893	4.19277	16.1449	9.90947
129.26	11.214	24.3282	22.268	22.6105	35.9193	11.5851	1.85233	5.15807	16.7038	9.8474
129.582	11.2351	25.4254	19.8571	25.6265	42.0207	13.444	1.67957	7.58597	16.9069	9.85597
129.904	11.6837	28.2494	17.1202	28.5731	42.8497	15.5674	1.72337	5.80257	18.7585	9.9946
130.225	11.6991	33.0566	14.7477	29.675	41.8932	17.1382	2.0927	5.2427	20.7617	9.34583
130.547	11.95	29.7038	13.5851	29.3161	39.7625	15.7694	2.34597	6.06047	20.9006	9.5821
130.868	11.9371	28.7911	12.8588	31.6144	36.112	16.0067	2.85727	6.41973	21.2447	9.71247
131.19	10.8734	31.0033	12.7661	33.8705	33.7911	15.0312	3.0594	9.03917	21.2822	8.70907
131.511	10.8126	28.3395	14.0294	35.5593	32.7267	13.3431	2.90267	14.132	22.3723	8.0149
131.833	12.8931	23.2282	13.89	34.8167	31.1567	14.0053	2.92143	15.4254	22.9344	8.0238
132.154	16.9142	17.942	13.6087	31.6407	29.7048	15.5091	2.8154	12.71	21.6211	7.65857
132.476	21.9421	15.7956	12.6913	29.9755	28.4926	18.3918	3.15717	10.1356	20.2115	7.67413
132.797	23.7391	15.6067	13.0196	28.8877	27.6444	22.1298	3.8295	6.83607	20.7994	8.14973
133.119	25.0483	15.1968	14.1844	28.3464	27.7674	23.112	4.2167	4.43687	20.5555	7.82367
133.441	27.4562	16.7083	16.8366	29.2037	27.6555	22.7863	4.53387	3.79183	22.0918	8.0535
133.762	27.787	17.9114	19.5575	28.4242	28.2925	24.0022	4.61337	3.238	26.5128	8.46143
134.084	24.0191	17.8498	21.5599	26.503	31.0207	26.3972	4.7111	3.56843	31.4004	8.61397
134.405	19.9511	21.6957	22.8056	26.1517	36.9677	27.7023	5.13807	3.01077	31.6807	9.1804
134.727	18.3379	28.1417	24.2282	28.0776	38.9563	29.8024	5.28107	1.94193	29.9838	9.6497
135.048	18.7782	35.0498	23.7764	23.9613	39.6418	30.3128	5.6092	1.93927	27.2805	8.82763
135.37	18.974	36.1344	22.9633	16.8102	39.8923	30.9769	5.0461	4.25993	24.3063	7.87947
135.691	19.1574	34.7332	22.1847	12.6764	39.0265	30.4662	3.7817	5.24567	23.5277	6.66117
136.013	20.1349	31.1761	22.7196	11.7292	37.9546	34.7278	2.9315	4.6858	24.4311	5.2207
136.334	21.8002	27.4563	23.4711	11.5315	38.3582	35.7687	2.56017	5.31883	25.4275	5.51273
136.656	23.4619	21.9541	24.9019	12.0808	39.5155	29.8631	2.7481	6.5877	26.3354	4.732
136.977	23.2449	18.5902	26.3428	11.8676	38.0748	31.4576	3.74347	9.0719	27.4913	4.1981
137.299	22.8533	16.2648	26.2716	11.9127	35.8002	33.667	4.51483	9.89073	30.5211	3.4778
137.621	22.9336	17.0731	25.5913	13.7088	34.9297	30.3689	4.78757	8.2557	34.1296	2.2565
137.942	22.9403	18.9001	25.1989	16.2883	36.3521	25.256	4.57867	5.89867	28.4358	1.66903
138.264	23.0202	18.7395	23.6064	15.1083	38.46	23.2276	5.62513	3.63993	25.9601	1.66667
138.585	24.8261	18.6418	22.0926	13.6625	38.1583	23.8179	7.0404	2.43783	23.8555	1.9126
138.907	26.7631	18.5788	21.1505	12.2757	35.8389	25.5478	6.91863	1.15117	20.1654	1.71103
139.228	27.5767	19.4536	20.6263	15.452	32.0532	28.3133	6.768	0.444433	16.8042	1.44807
139.55	28.4581	22.4844	19.6875	17.6594	29.9682	29.7822	7.62597	0.457433	13.789	1.20547
139.871	28.5592	29.4428	19.7235	18.9421	32.0387	25.3557	8.519	0.5116	10.4141	1.4247
140.193	26.6224	36.5469	20.545	19.871	36.7953	21.8339	10.9746	0.391267	8.60603	1.34003
140.514	23.9955	40.3806	22.0915	20.4264	39.6386	23.0007	11.9878	0.334167	8.35347	1.27863
140.836	22.3587	43.6491	20.146	22.8401	41.7242	23.2602	11.8388	0.484933	8.45513	1.13443
141.158	21.8776	44.7502	17.3002	24.6452	41.6093	20.9376	12.7797	0.616033	7.9564	1.03663
141.479	21.6149	46.0844	15.1048	23.0598	36.4583	19.4387	14.5802	0.7164	7.74017	1.2642
141.801	20.4567	35.5207	14.8251	20.1863	25.3746	20.0239	15.8578	0.2862	9.63237	1.02893
142.122	18.5042	28.134	16.1488	19.6489	20.4985	19.8572	14.4155	0.041	11.0991	0.8117
142.444	17.7845	27.8865	18.7481	21.199	17.7601	18.8419	15.3438	0.727533	12.0482	1.1676
142.765	18.6619	30.1943	19.2771	20.4239	16.8983	16.9144	16.0621	1.02023	13.9409	0.643133
143.087	20.4556	32.6861	18.3891	17.0764	16.2651	14.5196	17.3665	1.99053	15.4803	0.453467
143.408	20.7488	34.2799	17.7637	14.387	15.2407	12.5571	18.2551	1.13187	14.074	0.5049
143.73	19.7665	36.6962	18.2023	16.5126	14.5555	15.3528	18.4125	1.39333	14.3204	0.754667
144.051	18.9707	38.233	19.3524	20.0061	15.3115	18.5322	16.8503	2.22277	14.9545	1.037
144.373	17.7164	38.2566	20.0877	21.28	16.1786	19.1066	15.8191	3.47327	14.22	0.7548
144.695	16.7882	36.5661	21.6741	20.5547	18.1519	22.5052	15.9774	3.56703	16.933	0.891733
145.016	15.4876	33.1707	23.3072	23.0399	20.0513	29.0457	17.0002	4.01123	19.1346	0.9065
145.338	13.7183	30.7004	25.4434	25.2432	22.3736	30.2174	18.0737	4.114	21.0305	1.1596
145.659	12.3019	29.5031	29.3395	27.0085	22.6239	23.3824	19.912	3.53867	23.1991	1.0576
145.981	11.7101	27.9725	36.1597	27.8075	20.7062	16.7622	21.9023	1.62713	26.3822	0.761367
146.302	11.1	27.368	38.3772	28.7212	20.0131	16.5644	23.9286	2.74323	26.435	0.856267
146.624	11.6303	28.179	35.3221	28.9203	19.2753	18.8288	28.5084	2.71993	25.8543	0.7856
146.945	12.7286	30.751	29.2563	25.5146	18.6502	20.529	30.6325	2.52027	25.7007	0.846833
147.267	13.1511	30.7723	24.8392	20.3409	18.944	21.7118	26.4686	2.57557	25.6355	1.05757
147.588	12.7057	27.7292	23.6461	17.5967	19.4222	20.3812	22.7875	3.01413	26.8055	1.0546
147.91	11.4437	24.0787	21.7408	19.9171	19.9376	16.2748	22.0214	3.29627	29.7327	1.23623
148.232	10.7652	23.2166	21.0941	22.1588	18.6477	13.9934	21.2246	4.08667	33.4541	1.06437
148.553	10.0036	21.1874	21.3047	26.0822	18.9584	14.1063	19.6319	5.17307	35.591	0.823833
148.875	9.31143	21.7332	22.8282	29.2617	17.7775	15.0894	19.2789	6.7198	38.4621	1.2293
149.196	8.5476	20.1781	25.472	34.4868	16.5458	16.5917	19.5949	6.40873	41.137	1.4851
149.518	7.7028	19.6282	29.108	38.2018	16.511	17.3635	20.8332	7.0965	45.7503	1.25553
149.839	7.2773	19.6594	36.5611	33.483	16.639	18.1829	20.778	10.8265	49.9276	1.32817
150.161	7.18913	19.8348	42.7149	26.7092	16.7975	18.9814	20.7697	17.7596	51.3736	1.5917
150.482	7.22723	18.1317	45.8787	22.9584	18.0034	19.2705	20.7122	24.9733	51.0613	1.27833
150.804	7.65507	17.9854	51.3477	20.8831	20.3978	20.3838	19.7173	25.5266	50.471	1.18347
151.125	8.37177	18.4278	47.3632	19.2605	17.9469	23.2259	18.1196	23.5955	49.6628	0.9247
151.447	8.6615	19.721	41.482	20.5474	15.5071	25.7522	17.4871	22.5424	52.703	1.1597
151.768	8.22247	21.3592	37.9126	21.3263	14.1673	27.5341	17.9235	21.5691	55.8963	1.34523
152.09	9.1246	19.3155	34.3775	22.4519	13.2947	28.1554	19.2468	21.0756	58.5986	1.7686
152.412	11.379	20.9084	36.0871	24.3223	13.9664	28.3197	20.6686	21.2902	64.2784	2.03037
152.733	15.6684	22.1914	36.1008	26.3615	13.3299	26.3658	19.5604	21.1143	70.3917	2.1502
153.055	19.2457	20.7793	31.6492	28.037	13.8441	24.6611	17.7982	20.9843	69.7211	2.08783
153.376	20.2305	22.4713	27.4095	32.7822	13.3416	28.2662	18.4018	21.0639	69.0955	3.0595
153.698	17.98	28.1524	19.8787	36.0146	13.5311	32.5964	21.4585	20.9315	67.9667	4.57857
154.019	16.9669	30.8928	18.4483	32.6646	12.7783	41.0442	21.2422	22.1773	66.0064	4.44177
154.341	17.3833	30.2703	20.3089	32.726	13.2834	42.047	18.8101	24.1367	64.4786	4.69713
154.662	16.1337	27.7613	21.9555	34.3376	13.2048	40.4224	19.9912	24.8148	61.8417	5.21957
154.984	14.7096	24.7752	26.1821	33.4242	12.0866	40.6394	22.0862	25.4682	58.6168	4.80043
155.305	14.8103	24.6756	29.0055	28.7391	11.8878	42.2414	22.2559	25.7443	60.2331	4.82357
155.627	15.4087	26.2588	29.654	25.6108	12.2796	43.5423	22.1732	26.9825	60.5863	5.3889
155.949	15.5252	28.0478	29.1485	25.1306	12.8943	41.5412	23.0717	27.8204	59.8694	5.98783
156.27	16.1592	29.112	29.2861	27.6225	14.7347	39.8018	24.6569	28.5535	63.1947	6.9543
156.592	17.0756	27.4086	29.8381	30.3635	18.3869	41.5456	27.7112	29.4626	66.0798	7.40227
156.913	18.5602	29.6541	30.58	32.0218	23.2471	45.4895	30.4587	29.3503	64.6547	7.78917
157.235	21.6695	31.3875	29.9392	32.801	28.1755	50.0451	31.5341	29.3273	60.1331	8.42557
157.556	22.1457	35.3297	29.3372	33.0428	34.6169	52.6823	32.6719	29.3697	56.4255	8.22247
157.878	22.519	42.2968	29.2955	37.6093	42.2712	53.7601	32.4452	31.6708	56.2165	8.39347
158.199	25.609	45.0635	29.6877	39.4855	48.7346	57.0966	32.3125	36.6	55.7487	8.4416
158.521	27.8939	43.2675	30.3439	39.1764	49.3318	60.6571	31.9625	38.4868	56.1621	8.77257
158.842	26.1033	41.0228	30.2025	38.3325	46.812	61.2664	31.4909	34.3734	56.2926	8.47307
159.164	23.5881	39.7266	29.8403	35.3291	42.1859	62.5135	31.9859	30.1866	55.3949	7.97167
159.486	21.9268	41.9304	28.305	31.1424	39.4565	61.3636	33.7699	29.2507	55.332	7.74583
159.807	21.8527	43.0686	25.4202	27.4566	36.7977	60.8844	35.4389	30.0215	54.3008	8.62307
160.129	24.661	39.804	24.1225	26.3998	34.0568	60.7197	37.3892	30.6426	52.5644	9.04493
160.45	25.0108	36.4489	26.5002	26.7376	33.0658	61.5241	39.649	32.8888	51.4676	10.5328
160.772	25.4254	35.3007	29.2253	28.901	32.5212	59.9795	38.849	34.1787	52.905	13.4135
161.093	25.9383	33.7943	29.0736	30.9588	35.1243	57.4141	35.464	33.3578	52.5091	18.6073
161.415	24.0867	31.5513	28.7313	37.248	37.7038	59.2598	35.9965	31.511	53.0023	24.2564
161.736	22.1301	30.3546	27.3546	42.5498	36.2101	62.8635	39.1468	33.3467	54.1785	28.6766
162.058	22.8579	28.4136	25.0708	37.343	32.3444	67.8107	43.8802	37.6265	58.5838	33.6592
162.379	24.4777	28.0459	23.5153	35.6634	29.2282	66.3766	44.4411	39.6852	60.9652	38.4923
162.701	24.9144	28.4926	24.0469	42.1181	27.0634	61.8916	44.571	39.585	59.1231	39.188
163.023	24.2899	29.6656	25.1325	39.9051	26.8877	60.25	38.9984	39.5067	54.5477	38.8306
163.344	24.065	35.6033	26.3987	34.6562	26.3082	59.6079	35.1267	40.7645	51.5335	36.4479
163.666	24.4725	38.9007	26.5122	34.7018	26.0643	60.0672	36.8909	42.4535	51.8307	32.4697
163.987	25.2329	40.4402	25.7693	37.5199	26.235	60.4034	41.3296	43.9045	50.394	31.8985
164.309	24.6645	40.8877	24.0679	33.6922	26.8074	60.7007	44.6986	45.0627	48.2877	32.1879
164.63	22.7907	41.2042	23.4621	29.5382	28.479	57.7495	40.4788	44.2384	47.9734	29.8061
164.952	21.6658	46.1635	23.4822	27.2998	30.2724	58.9567	34.7151	44.0742	48.0679	25.7748
165.273	21.3854	47.1171	23.1112	26.9489	31.1734	61.6773	37.7246	45.861	48.648	23.7523
165.595	22.9526	49.5489	23.4837	25.3236	32.0583	59.9055	41.8472	48.1267	49.6028	25.2528
165.916	26.7777	51.5013	23.489	23.8338	32.3467	59.5552	41.1875	49.636	51.5783	26.2172
166.238	31.0974	54.8318	22.8382	21.4487	30.5493	60.9885	40.3715	51.1582	56.9055	22.6361
166.559	35.1553	57.1944	22.9178	19.5031	29.8021	61.5457	44.1039	52.517	54.0547	21.815
166.881	37.0674	59.7175	22.1466	17.6296	28.3642	58.3423	45.765	52.9944	52.7481	22.2306
167.203	33.0103	64.5574	20.218	16.8168	28.1911	55.1652	44.0991	51.656	54.9675	22.043
167.524	32.3199	61.9245	18.4943	19.2191	28.3893	55.2459	42.5065	51.9228	54.4818	21.1464
167.846	32.7976	57.8693	19.3352	21.9599	27.5021	57.0631	40.3188	55.1186	50.1808	20.2774
168.167	30.0934	55.4942	18.4785	20.2135	27.4434	56.6398	39.1566	57.0435	49.9344	21.0792
168.489	25.501	55.0202	17.9803	16.264	28.5335	56.9852	41.8188	54.3942	49.1791	25.376
168.81	21.2364	50.7601	18.3103	13.8945	29.5108	56.6423	42.0889	51.8151	48.4481	26.3814
169.132	18.3504	46.1707	21.118	13.0361	30.8603	55.5414	40.5874	49.9764	46.4201	21.6226
169.453	18.2601	46.2632	25.4804	13.0113	30.4698	54.808	37.8729	48.4805	39.651	16.7331
169.775	21.538	50.4717	28.3873	16.2336	29.3867	53.3867	39.8719	47.7357	35.9297	15.0388
170.096	23.8842	51.0551	25.8565	17.9611	31.0202	51.7338	42.5191	48.4036	34.5712	15.0556
170.418	23.8159	46.7767	25.4326	17.4012	32.2833	48.473	40.3342	47.5075	37.0444	16.2587
170.74	24.0504	45.6379	29.6608	19.2288	33.8992	46.183	36.3907	44.6686	39.6363	17.5793
171.061	24.421	46.6643	42.7299	23.005	34.6667	46.042	35.3358	42.493	41.3392	18.0733
171.383	21.8608	46.5997	58.1288	25.9983	30.4748	47.2739	34.2029	40.4258	42.5357	18.9795
171.704	17.4507	44.7332	63.5183	24.4359	29.3621	49.3679	35.3804	40.0106	44.3149	19.9571
172.026	15.2304	42.1067	62.7862	22.7515	29.8039	48.5784	39.804	39.907	43.5773	21.1117
172.347	14.6618	39.589	59.796	20.5182	30.6609	45.1154	42.8223	42.2046	42.6671	23.038
172.669	13.8199	40.4071	57.7115	18.6192	29.2123	43.963	45.8412	39.2431	45.111	25.6621
172.99	12.4667	43.317	58.9494	20.5533	25.9613	40.2262	49.8254	34.6185	48.0957	26.9456
173.312	11.2051	45.9584	61.4218	26.3914	22.7382	39.6262	45.0729	31.5177	44.0794	29.1978
173.633	11.0638	45.3144	62.7695	31.6391	20.4993	40.1382	42.125	30.5802	41.8104	32.6706
173.955	10.9661	43.2205	62.5874	35.5334	20.6943	39.9973	37.5779	31.6109	42.6223	34.7723
174.277	12.6322	40.0019	60.2378	36.404	21.2086	37.8925	34.3942	29.9223	40.4959	35.5794
174.598	16.1156	38.1947	59.2611	33.0158	21.9713	36.7669	33.9235	27.6756	36.4372	35.4218
174.92	17.4913	39.3461	60.9445	25.9797	21.8986	36.5203	37.05	26.2873	34.7001	36.2603
175.241	16.6046	42.0892	64.4908	20.851	22.2875	37.7355	39.5104	24.2699	35.5355	36.602
175.563	14.0033	42.4245	66.8797	17.0668	23.7499	37.9283	41.4031	24.8286	38.5201	35.6579
175.884	12.7363	44.1131	68.0085	14.9373	23.9801	35.2385	44.4132	25.6621	39.2087	35.1509
176.206	13.1068	51.5895	65.2151	14.5125	22.877	33.4767	45.6569	25.3343	36.8104	36.1596
176.527	14.2189	60.6543	53.767	14.7527	21.4651	31.7087	48.2253	27.8712	36.1565	37.7423
176.849	18.6331	60.3329	40.9128	14.1917	21.3199	30.8251	49.0569	29.0548	35.2367	37.8023
177.17	22.85	50.7607	32.7184	14.341	20.416	28.2519	44.7973	28.6373	32.5691	35.8022
177.492	23.2586	42.2279	28.0697	14.9313	19.1522	26.2988	42.4396	26.2061	32.3043	33.5519
177.814	20.6558	40.1164	24.4963	14.7505	19.1376	24.5219	41.9242	24.1321	32.5269	31.162
178.135	18.5412	43.1502	20.3429	12.0942	20.2394	25.6204	35.1318	22.0989	32.2649	29.6075
178.457	18.0685	42.4076	15.3916	10.7624	21.3515	26.8368	30.7262	20.078	32.3325	28.9116
178.778	17.8437	37.5498	14.0741	12.7006	21.7932	25.774	28.8715	18.0754	33.5182	29.5102
179.1	18.3268	36.4674	13.5627	16.4724	20.7945	23.2308	28.0144	18.149	35.986	28.1519
179.421	19.6766	36.9625	13.5781	18.8646	19.5508	19.9317	28.4432	20.826	38.1456	26.5115
179.743	19.4849	40.5232	14.5967	15.4039	18.6172	18.283	30.8821	26.57	38.4337	25.7544
180.064	20.9151	44.543	17.5776	12.0163	19.41	19.2685	31.6075	33.7557	37.265	26.3022
180.386	22.0754	44.9727	22.7774	10.9389	21.3786	17.9325	27.4096	35.7996	34.1114	27.8172
180.707	23.9026	42.1831	30.3934	10.8697	22.3241	17.4217	25.1065	34.4833	31.0916	28.1426
181.029	26.3758	38.1391	29.7481	10.8959	23.0565	18.218	28.2856	32.2934	28.3626	28.8078
181.35	28.5951	34.6456	28.8313	9.41757	23.5935	14.8813	26.9507	34.0615	27.6228	31.0079
181.672	32.6641	31.2467	28.4957	7.27797	23.5188	13.1381	25.1415	34.1384	31.5868	31.9504
181.994	36.8286	29.1347	27.3329	6.40603	22.4929	14.2559	23.6698	32.8378	39.3055	33.5742
182.315	38.2472	28.762	27.7417	7.60257	20.6232	14.4554	21.3383	30.9477	34.3126	34.4184
182.637	42.8651	30.7799	28.7969	9.00603	17.5346	12.6349	18.9923	30.9733	27.9181	35.371
182.958	46.528	30.2097	31.8663	9.6112	16.6189	11.4599	18.5369	33.3132	25.7763	36.2139
183.28	48.8556	30.5148	36.3928	8.2068	17.8567	10.654	18.6762	34.9377	22.6159	36.5708
183.601	52.9394	30.5771	40.3961	6.9243	17.8851	9.6986	17.7022	38.9556	19.7376	37.3142
183.923	60.3601	30.6533	41.4187	6.71147	14.1421	10.0574	16.5337	46.7168	17.8107	37.8085
184.244	68.6357	29.3954	43.1674	6.69347	12.527	11.6257	15.0695	48.6876	14.9709	37.8367
184.566	71.6805	29.1627	44.4659	7.13067	12.7462	10.7147	13.1969	49.9808	12.8574	38.7931
184.887	68.0504	30.829	47.1707	8.29007	12.1131	8.11183	12.656	51.7933	10.2028	39.3638
185.209	64.8524	32.5905	51.8064	7.9478	10.8631	6.94157	13.6113	55.4776	7.90997	39.7046
185.531	66.2532	32.4426	53.7285	7.72943	10.5646	7.42977	13.5783	61.7172	7.3958	39.6666
185.852	69.407	29.6025	52.119	9.4906	10.2089	6.54133	10.6015	64.4813	7.42323	39.6791
186.174	71.5896	29.5614	51.3702	11.9795	10.3802	4.92537	8.03247	66.2897	7.24507	40.2384
186.495	74.7314	30.2757	51.0901	13.0512	11.3215	4.1902	7.38363	67.0142	7.92847	40.9077
186.817	76.0282	32.5833	51.2281	12.7501	12.3688	4.20383	7.27373	66.3707	8.22593	42.2608
187.138	73.9859	32.045	51.0242	13.7722	13.247	3.75627	6.57837	66.9285	8.2886	42.342
187.46	72.8282	30.2225	51.0581	16.3625	13.1126	3.2125	3.55323	66.4815	8.5465	42.6648
187.781	73.897	29.5015	52.3183	18.8457	14.6569	3.24463	1.52757	68.1265	8.8719	43.1141
188.103	77.0512	28.9996	53.2095	17.5655	14.3107	3.5001	3.1044	71.2422	9.1034	42.9657
188.424	76.0622	28.0609	53.9511	15.9892	13.4991	2.3474	1.14137	71.3412	9.5233	42.1852
188.746	69.7236	29.0693	54.5891	14.2999	12.2554	1.23593	0.5357	69.5113	10.1627	42.0996
189.068	67.0863	29.7683	53.2613	15.6604	12.6517	0.766367	0.427267	69.7373	10.2813	40.9582
189.389	68.8231	29.3949	49.9175	17.1286	14.5343	0.4713	0.407167	71.2179	16.7769	40.8408
189.711	65.1217	28.715	47.0022	16.5556	16.1708	0.1648	0.553767	73.0923	16.9912	41.165
190.032	62.2503	29.6361	45.1362	15.9443	16.1615	0.080967	0.3718	74.732	14.2132	40.5076
190.354	61.1858	31.6974	44.2701	14.5104	14.9274	0.0646	0.1151	77.6869	15.4067	40.1892
190.675	56.4108	32.0221	43.8489	15.8898	14.7182	0	0.1458	78.9209	18.9799	40.0499
190.997	55.3446	31.6629	44.0993	15.5998	15.1338	0.016867	0.104933	79.2087	25.0264	39.5251
191.318	49.4029	30.9901	46.7081	11.9147	16.2397	0	0.223133	79.9298	29.93	39.5033
191.64	46.0088	28.5002	47.6393	9.73153	16.5595	0	0.1768	79.1038	31.8015	40.5342
191.961	46.6457	27.0623	50.747	5.7938	17.169	0	0.2825	79.0063	34.1537	41.4156
192.283	46.2519	26.0865	54.9953	3.50483	17.722	0.2211	0.0632	79.3372	37.9692	41.9568
192.605	44.2911	25.5945	56.7385	1.55577	18.3529	0.029367	0.218367	79.3725	42.5325	41.1932
192.926	40.8371	24.116	57.2635	1.11447	19.0439	0.000967	0.069133	78.9641	45.8489	41.6746
193.248	39.0622	22.0841	57.4798	3.81407	17.2881	0	0.0854	77.7749	46.4556	42.7978
193.569	40.2374	21.0042	53.4269	4.26777	17.1277	0	0.3346	76.3948	43.9233	43.649
193.891	38.1996	19.9067	52.1217	2.7619	18.3111	0	0.3328	74.5285	39.2987	44.8063
194.212	36.3745	20.9276	53.8411	1.97967	18.7706	0	0.436433	70.9532	36.8857	44.948
194.534	36.2542	21.1897	51.3076	0.733167	17.243	0.001233	0.544467	65.3461	40.3422	45.2091
194.855	37.4667	22.7655	47.7446	0.704433	16.9515	0.049733	0.394133	59.9512	40.1626	47.1694
195.177	36.1745	23.57	44.339	1.03597	16.2179	0.086867	0.346	52.367	31.6838	50.0694
195.498	33.6117	23.4666	40.4571	2.21633	15.8208	0.0006	0.441733	44.2292	25.5414	51.4434
195.82	30.8413	22.5119	37.8399	2.04107	17.0465	0	0.124767	37.6244	21.4619	49.8344
196.141	29.3482	21.8519	35.7086	1.68147	17.1048	0	0.033067	32.5859	19.0032	48.6762
196.463	26.9426	21.9316	35.1324	1.279	16.3899	0	0.0709	30.2422	16.7047	47.83
196.785	25.8333	21.6223	37.3509	1.50547	16.5484	0	0.005067	29.541	14.8771	46.2166
197.106	25.7651	22.1194	42.9881	0.102833	16.9869	0	0.013033	29.45	13.1518	44.6746
197.428	26.7869	24.2504	49.0003	0.066533	16.0917	0	0.124667	29.1688	11.7336	43.4852
197.749	28.5865	26.682	52.9177	0.274233	15.1087	0	0.128767	29.0513	11.4726	41.6884
198.071	30.3602	28.4581	58.4174	0.539933	16.3824	0	0.017933	27.0898	13.1139	38.695
198.392	31.2475	27.6982	62.9228	1.1938	16.4858	0	0.0099	23.3663	15.1901	35.7864
198.714	31.7197	27.1346	64.1983	2.12267	16.6381	0	0.1315	21.2634	14.6415	32.9656
199.035	32.856	24.5931	65.0294	3.5866	15.9734	0	0.207767	19.755	12.0336	30.3508
199.357	32.8243	23.4051	65.7606	5.00057	15.5384	0	0.0255	17.6759	9.4344	28.3161
199.678	30.6553	23.0066	64.9857	6.4324	15.7738	0.049267	0.0618	15.2735	9.69067	27.4084
200	29.4179	22.2338	62.5958	6.64797	15.24	0.0022	0.0202	12.3436	10.7413	27.3424
200.322	29.9772	21.6915	60.8064	6.76287	13.5406	0	0.0792	8.14513	13.5364	26.7988
200.643	31.5155	19.7644	57.916	4.76793	12.6652	0	0.041433	4.20427	16.2303	24.0207
200.965	31.4402	18.8164	56.3206	2.4737	12.3633	0	0.059167	1.6768	16.7992	19.4906
201.286	33.482	19.4508	49.604	2.8335	11.2645	0	0.0293	0.7386	14.4233	15.4491
201.608	36.1803	16.7697	42.5589	4.2142	10.7975	0	0	0.288133	12.0629	13.4866
201.929	32.445	15.4473	40.4142	5.15593	11.4525	0	0	0.1345	9.85443	11.5496
202.251	28.1779	15.2409	40.6783	5.93983	9.92913	0	0	0.195467	8.33473	9.34087
202.572	26.1207	14.7148	35.8197	7.00943	10.315	0	0	0.166567	8.89437	7.41423
202.894	26.8436	14.0877	30.8065	5.72933	11.9501	0	0	0.0115	10.1186	7.05037
203.215	27.6066	13.5827	28.1107	4.1894	12.1605	0	0	0.097367	10.3315	6.61847
203.537	26.7457	12.6376	26.1256	3.50453	11.8817	0	0	0.113267	10.4753	5.71903
203.859	26.8159	13.4149	25.1722	3.2344	12.4144	0	0.063667	0.021767	11.0853	4.79447
204.18	25.8469	14.0263	24.33	4.0953	14.5177	0.0111	0.029767	0.116733	13.8586	3.9539
204.502	28.0779	13.0749	24.3049	3.05603	16.4046	0.024367	0	0.1111	16.6266	3.6407
204.823	31.222	13.9531	24.0393	2.71103	17.4083	0	0	0.087433	15.9124	3.0602
205.145	30.2751	14.9068	24.1479	2.82293	17.5441	0.034	0	0.110767	15.4035	2.44223
205.466	30.3493	15.3911	23.9521	4.16943	18.094	0.139667	0	0.0462	12.9826	1.64003
205.788	26.9191	14.1842	23.8519	5.79353	18.3778	0.109167	0	0	13.1884	1.07877
206.109	24.3729	11.6295	23.8421	2.93667	18.0249	0	0	0	15.5523	1.10143
206.431	23.7002	10.8851	23.5591	0.7353	18.4855	0	0	0	16.2374	1.17937
206.752	25.4544	11.9406	23.4667	0.017833	18.6836	0.000267	0	0.038933	14.4451	1.5776
207.074	25.0433	11.8674	23.248	0.178533	16.5202	0.237133	0	0.054467	14.2715	1.54663
207.395	23.8162	11.202	22.6238	0.069467	14.0165	0.0861	0	0	12.6342	1.1927
207.717	25.7072	12.2125	21.7397	0	14.0832	2.28903	0	0	11.3664	0.455667
208.039	29.837	14.5558	20.1518	0.0369	15.0667	4.29027	0	0	10.9449	0.1399
208.36	31.0715	16.9937	18.6358	0.417	16.1278	3.244	0.018433	0	11.3572	0.030367
208.682	28.0849	17.6989	17.864	0	16.9893	2.9858	0	0	10.6534	0.0276
209.003	28.1661	15.2408	18.1767	0.0178	18.476	2.59943	0	0	10.5875	0.070433
209.325	31.4021	12.6395	19.3169	0.005667	18.2206	1.84173	0	0	11.7825	0
209.646	32.2454	12.4764	20.0642	0	15.7672	1.2033	0	0	12.161	0.049867
209.968	25.2273	11.5439	19.6464	0	14.8886	0.812733	0	0	11.7714	0.267033
210.289	18.1528	10.6798	19.0006	0	15.656	0.632533	0	0	11.3586	0.3823
210.611	13.5499	9.86333	18.9324	0	13.8574	0.702433	0	0	11.1319	0.032833
210.932	10.6593	10.7655	18.9915	0	12.4149	0.9382	0	0	11.325	0.082767
211.254	9.44773	12.9814	18.3287	0	12.1249	1.0968	0	0	11.7589	0.013033
211.576	8.368	13.6069	18.3217	0	12.7755	0.493133	0	0	12.2761	0
211.897	7.8065	11.0661	17.7394	0	13.426	0.391367	0	0	11.4324	0.202333
212.219	6.7832	10.9341	16.1807	0	13.2354	1.0639	0	0	11.2622	0.1526
212.54	6.1955	12.9824	14.7409	0	12.6585	1.1887	0	0	9.7511	0.001533
212.862	6.50243	11.6626	13.5336	0	13.2737	0.717233	0	0	8.8203	0
213.183	7.22227	10.6673	13.1565	0	13.662	0.456433	0	0	7.50227	0
213.505	6.8841	11.0693	13.2069	0	13.7177	0.642167	0	0	6.11557	0.030133
213.826	6.37523	13.0309	12.4891	0	13.576	0.5327	0	0	5.98807	0.256233
214.148	5.6002	15.484	11.9733	0	13.3466	0.365767	0	0	6.5159	1.33547
214.469	6.0688	15.9157	11.4857	0	13.7665	0.057933	0	0	8.15273	0.377967
214.791	9.5371	14.6074	10.6351	0	13.8825	0.362533	0	0	9.90317	0.0958
215.113	9.77503	12.696	10.3201	0	14.2363	0.3717	0	0	7.33277	0.023767
215.434	6.613	10.3787	10.3522	0	14.7692	1.68347	0	0	4.0764	0.0058
215.756	4.6041	9.25377	10.7915	0	16.3191	3.33053	0	0	2.88627	0
216.077	3.9273	9.05257	11.1239	0	17.4329	3.6426	0	0	2.79577	0
216.399	3.53117	8.80027	12.6468	0	15.8402	2.9419	0	0	3.16657	0
216.72	3.09477	8.3366	15.152	0	13.9439	2.33137	0	0	4.59133	0
217.042	3.13533	7.35163	14.1626	0	12.8993	0.905833	0	0	3.29717	0
217.363	3.2385	6.77063	11.4863	0	12.5477	0.086367	0	0	2.0677	0
217.685	2.71477	6.57293	11.5228	0	11.4425	0	0	0	1.81063	0
218.006	2.72147	5.7883	13.3517	0	10.907	0	0	0	1.6806	0
218.328	3.23417	6.544	14.6712	0	11.4084	0	0	0	1.56247	0
218.65	4.65653	6.60733	15.7952	0	12.0303	0	0	0	1.54703	0
218.971	4.91517	6.54837	16.3066	0	14.1861	0	0	0	1.70453	0
219.293	3.21727	7.41693	15.5191	0	14.2082	0	0	0	1.41913	0
219.614	2.13517	7.2822	15.7841	0	13.2963	0	0	0	1.52023	0
219.936	1.81527	6.0053	17.1424	0	12.2158	0	0	0	1.74713	0
220.257	2.8178	7.32457	17.4819	0	11.5341	0	0	0	1.84423	0
220.579	1.6878	6.00127	16.8758	0	12.079	0	0	0	2.46607	0
220.9	0.413933	2.83833	13.8559	0	12.5373	0	0	0	2.8072	0.1375
221.222	1.0571	1.11297	12.1748	0	12.7635	0	0	0	2.86097	0
221.543	1.8693	0.5229	14.7728	0	12.4559	0	0	0	2.91163	0
221.865	2.14113	0.3606	14.2231	0	12.2476	0	0	0	2.7161	0
222.186	1.13097	0.381333	12.8328	0	13.9317	0	0	0	2.71897	0
222.508	0.302267	0.2488	12.0021	0	16.6324	0	0	0	2.82563	0
222.83	0	0.2391	12.823	0	14.7855	0	0	0	3.0648	0
223.151	0	0.237167	12.6297	0	13.265	0	0	0	3.40573	0
223.473	0	0.093833	12.5042	0	11.5333	0	0	0	3.69363	0
223.794	0	0.062233	13.8405	0	11.439	0	0	0	4.0692	0
224.116	0	0.002467	16.3257	0	13.1688	0	0	0	4.35627	0
224.437	0.356367	0.202133	15.7534	0	13.7706	0	0	0	5.3099	0
224.759	0.663	0.308567	16.4799	0	14.4956	0	0	0	6.20773	0
225.08	0.121	0.4379	18.0448	0	13.8962	0	0	0	8.6145	0
225.402	1.10267	1.0627	19.797	0	14.9131	0	0	0	13.4262	0
225.723	2.9909	1.4032	20.8118	0	14.9898	0	0	0	16.4432	0
226.045	2.80493	1.18773	21.0874	0	14.9802	0	0	0	16.5876	0
226.367	0.927833	1.529	20.5116	0	14.8803	0	0	0	15.2158	0
226.688	0.309533	1.71197	21.6942	0	14.1515	0	0	0	14.2413	0
227.01	0.745467	2.14887	22.2598	0	13.0432	0	0	0	16.1096	0
227.331	1.5613	2.9512	24.2702	0	13.4831	0	0	0	15.5523	0
227.653	1.5915	4.0457	23.0691	0	13.8283	0	0	0	15.421	0
227.974	1.25797	5.2609	23.4089	0	12.2135	0	0	0	16.8947	0
228.296	0.5994	6.16007	22.9092	0	10.1957	0	0	0	17.2474	0
228.617	0.3913	5.42757	23.6356	0	9.44843	0	0	0	15.7114	0
228.939	0.822	4.55263	24.0968	0	9.72083	0	0	0	14.795	0
229.26	0.812467	4.6191	23.734	0	10.9407	0	0	0	14.2756	0
229.582	0.267533	4.1374	20.7302	0	12.1751	0	0	0	14.6695	0
229.904	0.192833	3.54027	19.7215	0	12.9211	0	0	0	18.7258	0
230.225	1.06377	3.45003	20.4154	0	14.2914	0	0	0	20.6752	0
230.547	1.5778	3.06083	21.5216	0	14.0438	0	0	0	20.7752	0
230.868	0.607	2.5878	22.6159	0	13.1692	0	0	0	20.7427	0
231.19	0.223267	2.1605	23.7538	0	10.9529	0	0	0	22.0603	0
231.511	0.214533	1.66093	23.9833	0	8.79813	0	0	0	21.1652	0
231.833	0.009367	1.55413	24.2837	0	8.50507	0	0	0	18.2993	0
232.154	0	1.7283	25.3689	0	8.2062	0	0	0	16.7638	0
232.476	0	1.7455	26.9635	0	6.96677	0	0	0	21.488	0
232.797	0.242567	1.47207	28.4083	0	6.3372	0	0	0	17.3427	0
233.119	0.6544	1.59493	30.3353	0	6.28417	0	0	0	14.1344	0
233.441	0.5972	1.48737	31.3136	0	5.7723	0	0	0	12.0906	0
233.762	0.1005	1.24943	33.6471	0	5.70853	0	0	0	9.84797	0
234.084	0	1.28753	38.6374	0	5.66443	0	0	0	8.7994	0
234.405	0	1.4625	44.3462	0	6.59383	0	0	0	7.58263	0
234.727	0	1.64727	45.2503	0	8.25517	0	0	0	6.25673	0
235.048	0	1.56127	44.8385	0	7.63433	0	0	0	4.93043	0
235.37	0	1.80763	47.7267	0	6.43517	0	0	0	4.1764	0
235.691	0	1.3741	42.3091	0	6.66263	0	0	0	3.05453	0
236.013	0	1.51213	32.5425	0	7.46997	0	0	0.0194	2.61357	0
236.334	0	1.648	28.7217	0	8.09493	0	0	0.082067	2.314	0
236.656	0	1.64193	29.456	0	7.8323	0	0	0.001567	2.07077	0
236.977	0	1.31083	32.2935	0	7.97673	0	0	0	1.82453	0
237.299	0	1.53353	36.4504	0	8.17933	0	0	0	2.1974	0
237.621	0	1.95343	37.4062	0	9.09667	0	0	0	2.09053	0
237.942	0	2.38773	34.3376	0	9.56003	0	0	0	1.59447	0
238.264	0	2.6782	31.4915	0	10.001	0	0	0	1.31193	0
238.585	0	3.13093	30.798	0	10.8626	0	0	0	1.24727	0
238.907	0	3.17293	33.751	0	11.5488	0	0	0	1.17043	0
239.228	0	2.3467	37.9438	0	10.1352	0	0	0	0.850967	0
239.55	0.637867	1.33287	34.5996	0	6.76993	0	0	0	0.7691	0
239.871	0.085333	1.61143	28.3921	0	6.09463	0	0	0	0.995433	0
240.193	0	1.74833	24.5353	0	5.88937	0	0	0	1.05937	0
240.514	0	1.97413	23.9113	0	5.68317	0	0	0	0.8872	0
240.836	0	2.36	25.9435	0	5.74513	0	0	0	0.752233	0
241.158	0	2.08517	28.2442	0	6.27667	0	0	0	0.7862	0
241.479	0	1.48667	27.5598	0	6.82927	0	0	0	0.708	0
241.801	0	1.24533	22.5765	0	7.4572	0	0	0	0.6618	0
242.122	0	0.692967	21.9252	0	7.46723	0	0	0	0.630933	0
242.444	0	0.6751	22.3135	0	7.63613	0	0	0	0.5158	0
242.765	0	0.8077	24.2125	0	7.59943	0	0	0	0.537567	0
243.087	0	2.33633	26.3762	0	7.9498	0	0	0	0.426667	0
243.408	0	4.53383	31.1882	0	7.73613	0	0	0	0.3377	0
243.73	0	4.9969	39.0277	0	8.1389	0	0	0	0.412233	0
244.051	0	3.41683	45.2009	0	9.1707	0	0	0	0.305533	0
244.373	0	1.59967	49.8359	0	8.0807	0	0	0	0.3503	0
244.695	0	0.849333	53.385	0	6.5056	0	0	0	0.239167	0
245.016	0	0.864933	53.5513	0	5.8978	0	0	0	0.124167	0
245.338	0	0.805833	47.0678	0	5.16917	0	0	0	0.069167	0
245.659	0	0.398033	39.5179	0	5.27753	0	0	0	0.0904	0
245.981	0	0.045967	32.3761	0	5.63483	0	0	0	0.238467	0
246.302	0	0.211667	29.446	0	5.64813	0	0	0	0.0396	0
246.624	0	0.665233	28.422	0	5.34467	0	0	0	0.021567	0
246.945	0	0.890533	27.8118	0	5.55863	0	0	0	0.135333	0
247.267	0	1.20173	29.9679	0	5.93913	0	0	0	0.1125	0
247.588	0	1.02713	27.8129	0	6.6286	0	0	0	0.098833	0
247.91	0	1.0849	21.4442	0	6.5757	0	0	0	0.012467	0
248.232	0	0.8669	20.5593	0	6.3631	0	0	0	0	0
248.553	0	0.489933	19.2957	0	6.78433	0	0	0	0.0491	0
248.875	0	0.551233	17.7281	0	6.70777	0	0	0	0.271	0
249.196	0	0.761433	14.4963	0	5.75743	0	0	0	0.247133	0
249.518	0	0.7415	8.59237	0	6.62387	0	0	0	0.0957	0
249.839	0	1.3903	6.5711	0	6.32317	0	0	0	0.001433	0
250.161	0	1.3048	5.46127	0	4.44287	0	0	0	0.026733	0
250.482	0	0.014367	5.34917	0	3.93083	0	0	0	0.0462	0
250.804	0	0	7.53317	0	3.79023	0	0	0	0	0
251.125	0	0	3.9726	0	3.8699	0	0	0	0.025733	0
251.447	0	0.235933	1.4596	0	3.6726	0	0	0	0	0
251.768	0	0.685833	0.834033	0	3.65467	0	0	0	0	0
252.09	0	0.2991	0.6699	0	3.0292	0	0	0	0.010267	0
252.412	0	0.0963	0.500833	0	2.55	0	0	0	0.103333	0
252.733	0	0	0.422167	0	2.18927	0	0	0	0.233833	0
253.055	0	0	0.190533	0	1.95037	0	0	0	0.008633	0
253.376	0	0	0.323833	0	2.1671	0	0	0	0.012467	0
253.698	0	0	0.6074	0	1.8126	0	0	0	0	0
254.019	0	0	0.293767	0	1.7178	0	0	0	0	0
254.341	0	0	0	0	2.655	0	0	0	0	0
254.662	0	0.002433	0.026733	0	3.1044	0	0	0	0.0037	0
254.984	0	0.0108	0	0	1.95353	0	0	0	0	0
255.305	0	0.1784	0	0	1.1141	0	0	0	0	0
255.627	0	0.078067	0.033433	0	1.04797	0	0	0	0	0
255.949	0	0	0.337067	0	1.75363	0	0	0	0.0458	0
256.27	0	0	0.873667	0	1.86877	0	0	0	0.043867	0
256.592	0	0	0.703	0	2.12807	0	0	0	0	0
256.913	0	0	0.305	0	1.90687	0	0	0	0	0
257.235	0	0	0.574567	0	2.56173	0	0	0	0	0
257.556	0	0.006467	0.3539	0	3.73847	0	0	0	0	0
257.878	0	0.110767	0.148	0	2.18817	0	0	0	0	0
258.199	0	0.0563	0.212967	0	1.0792	0	0	0	0	0
258.521	0	0.028567	0.2813	0	0.399633	0	0	0	0	0
258.842	0	0.089767	0.5182	0	0.152633	0	0	0	0	0
259.164	0	0.297667	1.41377	0	0.194367	0	0	0	0	0
259.486	0	0.6627	2.04573	0	0.258667	0	0	0	0	0
259.807	0	0.641233	1.7209	0	0.268267	0	0	0	0	0
260.129	0	0.0155	1.11627	0	0.220267	0	0	0	0	0
260.45	0	0	0.969167	0	0.218633	0	0	0	0	0
260.772	0	0	0.998767	0	0.373067	0	0	0	0	0
261.093	0	0	0.7537	0	0.022433	0	0	0	0	0
261.415	0	0.003433	0.837533	0	0.0134	0	0	0	0.004167	0
261.736	0	0.097633	0.805533	0	0.083733	0	0	0	0.0669	0
262.058	0	0.008433	0.8586	0	0.227467	0	0	0	0.174567	0
262.379	0	0	1.3237	0	0.1888	0	0	0	0.104567	0
262.701	0	0	1.4997	0	0.036833	0	0	0	0.119067	0
263.023	0	0	1.069	0	0	0	0	0	0.191567	0
263.344	0	0	1.0386	0	0.064733	0	0	0	0.178133	0
263.666	0	0	1.98587	0	0.2118	0	0	0	0.162633	0
263.987	0	0	1.42487	0	0.300167	0	0	0	0.116533	0
264.309	0	0	0.466533	0	0.712367	0	0	0	0.083433	0
264.63	0	0	0	0	1.6419	0	0	0	0.000867	0
264.952	0	0	0.1027	0	3.24167	0	0	0	0	0
265.273	0	0	1.01543	0	1.42363	0	0	0	0.0211	0
265.595	0	0	1.1155	0	0.7698	0	0	0	0.045867	0
265.916	0	0	0.414267	0	0.039333	0	0	0	0	0
266.238	0	0	0.039967	0	0.1278	0	0	0	0	0
266.559	0	0	0.0468	0	0	0	0	0	0	0
266.881	0	0	0.052233	0	0	0	0	0	0	0
267.203	0	0	0.642167	0	0	0	0	0	0	0
267.524	0	0	3.4893	0	0	0	0	0	0	0
267.846	0	0	2.5869	0	0	0	0	0	0	0
268.167	0	0.0858	0.3365	0	0	0	0	0	0	0
268.489	0	0.2681	0.5001	0	0	0	0	0	0	0
268.81	0	0.4673	1.58773	0	0.2013	0	0	0	0	0
269.132	0	0.717467	1.22603	0	0.287	0	0	0	0	0
269.453	0	0.648967	0.192467	0	0.0617	0	0	0	0	0
269.775	0	0.492733	0	0	0	0	0	0	0	0
270.096	0	0.274667	0.128	0	0	0	0	0	0	0
270.418	0	0.173067	0.186867	0	0	0	0	0	0.079667	0
270.74	0	0.962967	0	0	0	0	0	0	0.0221	0
271.061	0	1.3264	0	0	0.070833	0	0	0	0	0
271.383	0	0.6265	0.037767	0	0.0083	0	0	0	0	0
271.704	0	0.3572	0	0	0	0	0	0	0	0
272.026	0	0	0	0	0	0	0	0	0	0
272.347	0	0	0	0	0	0	0	0	0	0
272.669	0	0	0	0	0	0	0	0	0	0
272.99	0	0	0	0	0	0	0	0	0.0332	0
273.312	0	0	0	0	0	0	0	0	0	0
273.633	0	0	0	0	0	0	0	0	0.010067	0
273.955	0	0	0	0	0	0	0	0	0	0
274.277	0	0	0	0	0.0048	0	0	0	0	0
274.598	0	0	0	0	0	0	0	0	0	0
274.92	0	0	0	0	0	0	0	0	0.011767	0
275.241	0	0	0.060767	0	0	0	0	0	0.081333	0
275.563	0	0	0.4076	0	0	0	0	0	0.0039	0
275.884	0	0	1.01133	0	0	0	0	0	0	0
276.206	0	0.005733	0.692867	0	0	0	0	0	0	0
276.527	0	0.048433	0.710933	0	0	0	0	0	0	0
276.849	0	0.004133	1.09987	0	0	0	0	0	0	0
277.17	0	0	0.336467	0	0	0	0	0	0	0
277.492	0	0	0.863433	0	0.044433	0	0	0	0	0
277.814	0	0	3.2291	0	0.502233	0	0	0	0	0
278.135	0	0	0.7808	0	0.145933	0	0	0	0	0
278.457	0	0	0.117667	0	0.005533	0	0	0	0	0
278.778	0	0	0	0	0.0458	0	0	0	0	0
279.1	0	0	0.007833	0	0.008067	0	0	0	0	0
279.421	0	0	0	0	0	0	0	0	0	0
279.743	0	0	0	0	0	0	0	0	0	0
280.064	0	0	0	0	0	0	0	0	0	0
280.386	0	0	0	0	0	0	0	0	0	0
280.707	0	0	0	0	0	0	0	0	0	0
281.029	0	0	0.029267	0	0	0	0	0	0	0
281.35	0	0	0.024867	0	0	0	0	0	0	0
281.672	0	0	0	0	0	0	0	0	0	0
281.994	0	0	0	0	0	0	0	0	0	0
282.315	0	0	0	0	0	0	0	0	0	0
282.637	0	0	0	0	0.0356	0	0	0	0	0
282.958	0	0	0	0	0.060433	0	0	0	0	0
283.28	0	0	0	0	0	0	0	0	0	0
283.601	0	0	0	0	0.001233	0	0	0	0	0
283.923	0	0	0	0	0.061867	0	0	0	0	0
284.244	0	0	0.3775	0	0.012133	0	0	0	0	0
284.566	0	0	0.142767	0	0.0464	0	0	0	0	0
284.887	0	0	0	0	0.060067	0	0	0	0	0
285.209	0	0	0	0	0.018067	0	0	0	0	0
285.531	0	0	0	0	0	0	0	0	0	0
285.852	0	0	0.094733	0	0.060267	0	0	0	0	0
286.174	0	0	0.074133	0	0.254367	0	0	0	0	0
286.495	0	0	0.097567	0	0.1929	0	0	0	0	0
286.817	0	0	0.0344	0	0.1528	0	0	0	0	0
287.138	0	0	0	0	0.442333	0	0	0	0	0
287.46	0	0	0	0	0.389433	0	0	0	0.0424	0
287.781	0	0	0	0	0.2558	0	0	0	0.005867	0
288.103	0	0	0	0	0.278633	0	0	0	0	0
288.424	0	0	0	0	0.183533	0	0	0	0	0
288.746	0	0	0	0	0.220033	0	0	0	0	0
289.068	0	0	0	0	0.260367	0	0	0	0	0
289.389	0	0	0	0	0.050633	0	0	0	0	0
289.711	0	0	0	0	0.065633	0	0	0	0	0
290.032	0	0	0	0	0.171067	0	0	0	0	0
290.354	0	0	0	0	0.013867	0	0	0	0.071933	0
290.675	0	0	0	0	0	0	0	0	0.018633	0
290.997	0	0	1.4634	0	0	0	0	0	0	0
291.318	0	0	1.90477	0	0	0	0	0	0	0
291.64	0	0	0.515033	0	0	0	0	0	0.0426	0
291.961	0	0	0	0	0	0	0	0	0.049033	0
292.283	0	0	0	0	0	0	0	0	0	0
292.604	0	0	0.013567	0	0	0	0	0	0.0515	0
292.926	0	0	0	0	0	0	0	0	0.022133	0
293.248	0	0	0	0	0	0	0	0	0	0
293.569	0	0	0	0	0	0	0	0	0	0
293.891	0	0	0	0	0	0	0	0	0	0
294.212	0	0	0	0	0	0	0	0	0	0
294.534	0	0	0	0	0	0	0	0	0	0
294.855	0	0	0	0	0	0	0	0	0	0
295.177	0	0	0	0	0	0	0	0	0	0
295.498	0	0	0	0	0	0	0	0	0	0
295.82	0	0	0	0	0	0	0	0	0	0
296.141	0	0	0	0	0	0	0	0	0.0038	0
296.463	0	0	0	0	0.0926	0	0	0	0	0
296.785	0	0	0	0	0.068233	0	0	0	0	0
297.106	0	0	0	0	0	0	0	0	0	0
297.428	0	0.191833	0	0	0	0	0	0	0	0
297.749	0	0	0.187967	0	0	0	0	0	0	0
298.071	0	0	0.891867	0	0	0	0	0	0.007133	0
298.392	0	0	2.98273	0	0	0	0	0	0.047833	0
298.714	0	0	1.27853	0	0	0	0	0	0	0
299.035	0	0	0.1588	0	0	0	0	0	0	0
299.357	0	0	0.1656	0	0	0	0	0	0.0165	0
299.678	0	0	0.560167	0	0	0	0	0	0.148833	0
300	0	0	0.329167	0	0	0	0	0	0.073467	0
300.124	0	0	0.4067	0	0
300.322	0	0	0.550367	0	0
300.643	0	0	0.2732	0	0
300.965	0	0	0.6889	0	0
301.286	0	0	0.730567	0	0
301.608	0	0	0.106133	0	0
301.929	0	0	0.058433	0	0
302.251	0	0	0.034633	0	0
302.572	0	0	0	0	0
302.894	0	0	0	0	0
303.215	0	0	0.067067	0	0
303.537	0	0	0.222267	0	0
303.859	0	0	0.0347	0	0
304.18	0	0	0	0	0.003333
304.502	0	0	0.040833	0	0.0682
304.823	0	0	0.3656	0	0.019633
305.145	0	0	0.313467	0	0
305.466	0	0	0.409767	0	0
305.788	0	0	0.008333	0	0.133567
306.109	0	0	0.083467	0.000967	0.356667
306.431	0	0	0.2485	0	0.3893
306.752	0	0	0.457967	0.006333	0.719333
307.074	0	0	0.730867	0.334733	1.65123
307.395	0	0	0.907233	0	2.18663
307.717	0	0	1.35203	0	3.01083
308.039	0	0	0.5176	0	2.38567
308.36	0	0	0.174967	0	1.90967
308.682	0	0	0.0641	0	1.13787
309.003	0	0	0.189533	0	0.680867
309.325	0	0.0019	0.1316	0	0.3662
309.646	0	0	0.266033	0	0.2205
309.968	0	0.022033	0.089333	0	0.5742
310.289	0	0.5036	0.1319	0	0.2682
310.611	0	0.3912	0.135133	0	0.083033
310.932	0	0.088667	0.145667	0	0.039933
311.254	0	0.026433	0.068167	0	0.016033
311.576	0	0	0.033433	0	0
311.897	0	0	0.0288	0	0
312.219	0	0	0.0187	0	0
312.54	0	0	0.151567	0	0
312.862	0	0	0.2673	0	0
313.183	0	0	0.358033	0	0
313.505	0	0	0.014433	0	0
313.826	0	0.008133	0.5255	0	0
314.148	0	0.0009	0.770833	0	0
314.469	0	0	0.624467	0	0
314.791	0	0.074433	0.6658	0	0
315.113	0	1.4073	0.634333	0	0
315.434	0	2.1241	0.580333	0	0
315.756	0	1.29937	0.749067	0	0
316.077	0	0.148533	0.808167	0	0
316.399	0	0	0.9327	0	0
316.72	0	0	0.920767	0	0
317.042	0	0	1.22433	0	0
317.363	0	0	2.33787	0	0
317.685	0	0	2.156	0	0
318.006	0	0	1.9635	0	0
318.328	0	0	2.79613	0	0
318.65	0	0	1.52363	0	0
318.971	0	0	0.707	0	0
319.293	0	0	0.815567	0	0
319.614	0	0	0.9411	0	0
319.936	0	0	1.7499	0	0
320.257	0	0	1.82713	0	0.419633
320.579	0	0	0.9731	0	0.266933
320.9	0	0	0.591067	0	0
321.222	0	0	0.849567	0	0.0127
321.543	0	0	1.07077	0	0.014433
321.865	0	0	1.68687	0	0
322.186	0	0.012467	1.84883	0	0
322.508	0	0.493433	2.20977	0	0
322.83	0	0.9662	2.2013	0	0
323.151	0	1.28187	3.1789	0	0
323.473	0	0.846367	4.48483	0	0
323.794	0	0.442867	4.20887	0	0.224733
324.116	0	0.4121	3.23617	0	0.2528
324.437	0	0.972467	3.85853	0	0.181033
324.759	0	0.5357	4.29113	0	0.2257
325.08	0	1.46363	3.40273	0	1.50293
325.402	0	1.83047	2.67673	0	4.3435
325.723	0	2.31173	2.4024	0	6.0428
326.045	0	2.40613	1.93847	0	3.24363
326.367	0	2.07673	1.92117	0	1.27527
326.688	0	1.50683	2.33113	0	0.541467
327.01	0	1.28287	2.20213	0	0.239367
327.331	0	0.866967	1.80077	0	0.263367
327.653	0	0.951333	1.86513	0	0.524667
327.974	0	1.199	2.22143	0	0.432433
328.296	0	1.27317	2.58843	0	0
328.617	0	0.318567	3.67017	0	0.000133
328.939	0	0.941	4.455	0	0
329.26	0	1.0037	4.2777	0	0.3747
329.582	0	1.99527	3.27563	0	2.31703
329.904	0	2.43873	2.2701	0	3.5575
330.225	0	1.91563	2.29583	0	2.22727
330.547	0	1.47273	2.37837	0	1.1169
330.868	0	1.3085	2.2922	0	0.309633
331.19	0	1.75987	2.6684	0	0
331.511	0	2.4563	3.49987	0	0.000567
331.833	0	1.95393	3.77787	0	0
332.154	0	0.3048	3.50117	0	0
332.476	0	0.098133	3.10127	0	0
332.797	0	0.0007	2.6506	0	0
333.119	0	0.3571	3.31713	0	0
333.441	0	0.065567	3.95667	0	0
333.762	0	0.248833	5.34163	0	0
334.084	0	0	4.20297	0	0
334.405	0	0	3.3487	0	0
334.727	0	0	2.783	0	0
335.048	0	0	2.22973	0	0
335.37	0	0	2.46817	0	0
335.691	0	0	2.6066	0	0
336.013	0	0	3.05537	0	0
336.334	0	0	5.21187	0	0
336.656	0	0	7.52753	0	0
336.977	0	0	8.057	0	0
337.299	0	0	6.92993	0	0
337.621	0	0	5.64457	0	0
337.942	0	0	5.7137	0	0
338.264	0.205633	0	5.7625	0	0
338.585	0.204033	0	5.12957	0	0
338.907	0	0	5.16703	0	0
339.228	0.134033	0	4.5908	0	0
339.55	0.264	0.006767	4.81303	0	0
339.871	0.806967	0.040033	4.87213	0	0.011367
340.193	0.503733	0.151367	4.2943	0	0.069733
340.514	0	0	4.02353	0	0.262267
340.836	0	0	3.543	0	0.8578
341.158	0	0	3.92917	0	0.507533
341.479	0.097333	0	3.8062	0	0.081433
341.801	0	0	4.5612	0	0.058067
342.122	0	0	4.50247	0	0.338533
342.444	0	0	6.13587	0	0.316133
342.765	0	0	7.17123	0	0.071367
343.087	0	0	8.00657	0	0.414367
343.408	0	0	7.8704	0	0.381733
343.73	0	0	7.4299	0	3.33e-05
344.051	0	0	6.63133	0	0.046767
344.373	0.011533	0	6.21237	0	0.0222
344.695	0	0.0343	4.75967	0	0.122567
345.016	0	0.022633	4.18177	0	0.236167
345.338	0	0.080733	4.19093	0	0.3813
345.659	0.235333	0.175567	4.05913	0	0.566867
345.981	0.009767	0.070033	3.19083	0	0.788667
346.302	0	0.044	1.41173	0	1.0597
346.624	0	0.118167	0.9287	0	0.927133
346.945	0	0.4013	0.901167	0	0.741
347.267	0	1.3366	1.1822	0	0.862167
347.588	0	1.8471	1.02603	0	0.492667
347.91	0	1.26767	1.1918	0	0.213733
348.232	0	1.35747	0.8549	0	0.168433
348.553	0	1.29937	0.822467	0	0.017667
348.875	0	1.22413	0.731667	0	0
349.196	0	1.55133	0.802867	0	0
349.518	0	1.4059	1.06273	0	0
349.839	0	1.3405	0.940567	0	0.003867
350.161	0	0.825933	0.626767	0	0
350.482	0	0.492333	0.473167	0	0.005767
350.804	0	0.442733	0.365767	0	0.216933
351.125	0	0.386433	0.2471	0.0705	0.667133
351.447	0	0.855333	0.265633	0.209133	0
351.768	0	1.62757	0.4486	0.2818	0
352.09	0	1.7214	0.328867	0.4661	0
352.412	0	0.906	0.229733	0.367867	0
352.733	0	0.4287	0.0447	0.260733	0
353.055	0	1.19933	0.657167	0.055567	0
353.376	0	2.16037	0.9949	3.99e-06	0
353.698	0	2.44843	1.4534	0	0
354.019	0	2.80607	1.63793	0	0
354.341	0	3.54983	1.29983	0	0
354.662	0	3.9811	1.4972	0	0
354.984	0	3.64423	1.56937	0	0
355.305	0.000167	3.3125	1.7517	0	0
355.627	0.1852	2.2704	1.83887	0	0
355.949	0.019133	2.80917	2.00707	0	0
356.27	0	3.0592	1.658	0	0
356.592	0.1015	2.9268	0.9304	0	0
356.913	0.279067	2.70967	0.689167	0	0
357.235	0	2.25957	0.708667	0	0
357.556	0	2.04833	1.31007	0	0
357.878	0	2.3196	1.21393	0	0
358.199	0.234167	2.64903	0.5445	0	0
358.521	1.05573	2.58537	0.380333	0	0
358.842	2.98563	2.3954	0.669967	0	0.929867
359.164	2.1639	2.8909	0.5486	0	1.5229
359.486	2.28517	3.10077	0.046833	0	0.102367
359.807	1.21943	2.87277	0	0	0
360.129	0.5715	1.98137	0	0	0
360.45	0.1053	1.1424	0	0	0
360.772	0	1.59937	0.128367	0	0
361.093	0	2.1942	0.220067	0	0
361.415	0	1.52683	0.518167	0	0
361.736	0	0.870933	0.590033	0	0
362.058	0	0.400033	0.613933	0	0
362.379	0	0	0.413	0	0
362.701	0.039833	0.0181	0.460267	0	0
363.023	0.7331	0.371967	0.785	0	0
363.344	0.038433	0.4406	1.52417	0	0
363.666	0	0.4308	1.7194	0	0
363.987	0	0.567967	2.45323	0	0.058
364.309	0	0.4932	2.98337	0	0.609767
364.63	0	1.53863	3.98927	0	0.485767
364.952	0	2.99163	5.02457	0	0.936767
365.273	0	2.6773	4.6823	0	1.53687
365.595	0	0.690833	4.65157	0	1.8237
365.916	0	0.0926	4.05963	0	2.5771
366.238	0.194833	0.012367	3.41437	0	2.88533
366.559	0.4906	0.043733	3.15253	0	2.99683
366.881	0.761767	0.092467	2.4436	0	2.8095
367.203	2.16313	0.044467	1.8004	0	2.0927
367.524	2.7662	0.1652	1.72797	0	1.87227
367.846	1.82427	0.043267	1.691	0	1.6177
368.167	0.967867	0	2.01327	0	1.15547
368.489	0.423033	0.025267	3.36797	0	0.844633
368.81	0.208367	0.159533	3.6344	0	0.3656
369.132	0.3689	0.7212	3.31943	0	0.4142
369.453	0	0.644167	3.59373	0	0.011933
369.775	0	0.663033	3.56097	0	0
370.096	0	0.395933	4.4672	0	0
370.418	0	1.14463	4.78773	0	0
370.74	0	0.4864	4.56087	0	0
371.061	0	0.4122	4.30623	0	0
371.383	0	0.1869	4.9758	0	0
371.704	0	0.312967	4.92543	0	0
372.026	0	0.858867	5.2876	0	0
372.347	0	1.36667	5.39463	0	0.0018
372.669	0	1.82097	5.10433	0	0
372.99	0.016867	2.16967	4.38257	0	0
373.312	0.094567	2.38953	3.9669	0	0
373.633	0.373667	2.56223	3.61563	0	0
373.955	0.318767	3.26803	3.5642	0	0
374.277	0.2284	3.602	2.60363	0	0
374.598	0.145833	3.49563	3.08897	0	0
374.92	0.017033	3.0636	3.52883	0	0.0102
375.241	0	2.21003	3.8492	0	0.0878
375.563	0	1.5218	4.55133	0	0.000233
375.884	0	1.48107	4.94077	0	0
376.206	0	2.11783	5.34047	0	0
376.527	0	2.94287	6.02123	0	0
376.849	0	2.39187	4.4071	0	0
377.17	0.010533	1.55417	4.80453	0	0.338733
377.492	0.080767	1.22863	6.20383	0	0
377.814	0.4048	1.2228	5.1446	0	0
378.135	0.016133	1.60543	3.32933	0	0.115567
378.457	0	1.95147	2.64133	0	0.289167
378.778	0	2.38203	3.0311	0	0.123233
379.1	0	2.64587	2.429	0	0.437067
379.421	0	2.18213	2.22313	0	0.389033
379.743	0	1.78693	3.2369	0	0.712933
380.064	0.0117	1.522	5.12943	0	0.420933
380.386	0	1.43767	5.02127	0	1.2591
380.707	0	1.39873	3.93213	0	2.74127
381.029	0.1852	1.15363	3.62757	0	1.8314
381.35	1.92507	0.679933	3.0388	0	1.17873
381.672	2.08627	0.107133	2.80537	0	0.548133
381.994	1.38037	0	2.65837	0	0.250233
382.315	0.418967	0	2.2612	0	0.095767
382.637	0.253367	0	1.59647	0	0.047433
382.958	1.9683	0	1.68117	0	0
383.28	2.22377	0	2.18807	0	0
383.601	0.572333	0.2634	1.27397	0	0
383.923	0	0.573367	0.684367	0	0
384.244	0	0.522933	0.493333	0	0.0286
384.566	0	0.560167	0.651833	0	0.0975
384.887	0.0119	1.14533	0.5707	0	0.423467
385.209	0	1.60823	0.4577	0	1.9418
385.531	0	0.852167	0.586233	0	3.6849
385.852	0	0.677333	0.994533	0	3.23607
386.174	0	0.7991	1.78657	0	1.75793
386.495	0	1.0882	2.53463	0	0.299367
386.817	0	0.912533	0.408767	0	0
387.138	0	0.382867	0	0	0
387.46	0	0.0039	0	0	0
387.781	0.0691	0.1869	0.007333	0	0
388.103	0.087467	0.542067	0.011933	0	0
388.424	0.1188	0.4283	0.077067	0	0
388.746	0.4165	0	0.0003	0	0.153367
389.068	0.543367	0	0	0	0.159033
389.389	0.596967	0	0	0	0
389.711	0.866267	0	0	0	0
390.032	0.8356	0	0	0	0.083467
390.354	2.05677	0	0	0	0.051467
390.675	1.95457	0	0	0	0
390.997	0.413933	0.060667	0.0003	0	0
391.318	0.0087	0.2211	0.030233	0	0
391.64	0.1401	0.263933	0.111967	0	0
391.961	1.15677	0.296433	0	0	0
392.283	1.71697	0.6405	0	0	0
392.604	0.009167	1.0976	0	0	0
392.926	0.0261	1.2106	0	0	0.363767
393.248	0.072133	1.1529	0	0	0.061833
393.569	0.006133	1.47533	0	0	0
393.891	1.20907	1.54537	0.0691	0	0.072567
394.212	1.7051	1.67977	0.6098	0	0.0111
394.534	0.5252	2.25027	1.29117	0	0
394.855	0.8339	2.1298	0.453233	0	0
395.177	0.851033	1.4206	0.044933	0	0
395.498	0.345433	0.9006	0.572867	0	0
395.82	0.364767	0.623467	0.801867	0	0
396.141	0.2699	0.221433	0.017767	0	0
396.463	0.366133	0.253367	0.049267	0	0
396.785	0.190167	0.181333	0.352333	0	0
397.106	1.19953	0.259967	0.3546	0	0
397.428	0.7021	0.447067	0.484133	0	0
397.749	0.287733	0.3975	1.04863	0	0
398.071	0.167067	0.6936	0.862267	0	0
398.392	0.244067	0.347233	0.0667	0	0
398.714	1.04657	0.015833	0.206867	0	0.004933
399.035	3.06273	0.0383	0.090367	0	0.0075
399.357	4.18027	0	0.0187	0	0
399.678	1.41277	0	0	0	0
400
