# Supplementary material for: A novel 3D visualization method in mice identifies the periportal lamellar complex (PLC) as a key regulator of hepatic ductal and neuronal branching morphogenesis
Source: eLife. 2026 May 7;14:RP108669. doi: 10.7554/eLife.108669 (PMC13152276; doi:10.7554/eLife.108669)
Supplement: Figure 2—source data 2. [file elife-108669-fig2-data2.xlsx]

## Sheet: Sheet1
Figure 2 - Source Data 2
Figure 2L: Distribution of PLC areas along primary portal vein trunks with diameters ranging from 63.45 to 321.42 μm. Each value represents the PLC area associated with a portal vein of corresponding diameter (n = 19).
Summary Statistics (arithmetic from GraphPad Prism 7)
Pearson r
r	0.7492
95% confidence interval	0.4471 to 0.8979
R squared	0.5613
P value
P (two-tailed)	0.0002
P value summary	***
Significant? (alpha = 0.05)	Yes
Number of XY Pairs	19
PV diameter(µm)	Area of Neck（µm2）
133.248	13990.2
154.218	9301.4
155.09	10083.5
284.917	14722.8
214.79	12197.1
240.337	10880.9
253.417	9881.31
158.797	12597.2
260.808	13719.4
95.9767	3141.99
63.3425	1869.45
270.572	24230.2
314.738	35473.5
193.577	23009.3
231.363	18221.3
210.335	21944.9
321.417	36393
290.55	32669.3
205.863	26179.7
