# Supplementary material for: A novel 3D visualization method in mice identifies the periportal lamellar complex (PLC) as a key regulator of hepatic ductal and neuronal branching morphogenesis
Source: eLife. 2026 May 7;14:RP108669. doi: 10.7554/eLife.108669 (PMC13152276; doi:10.7554/eLife.108669)
Supplement: Figure 3—source data 1. [file elife-108669-fig3-data1.xlsx]

## Sheet: Sheet1
Figure 3 - Source Data 1
Figure 3G: Statistical analysis of the number of dye leakage foci shown in the left panel (H), comparing the PLC with the perisinusoidal regions adjacent to the portal vein. *** indicates a highly significant difference between groups (P < 0.001).
Summary Statistics (arithmetic from GraphPad Prism 7)
Table Analyzed	Data 2
Column B	Perisinusoidal
vs.	vs.
Column A	PLC
Unpaired t test
P value	0.0001
P value summary	***
Significantly different (P < 0.05)?	Yes
PLC diameter	PLC	Perisinusoidal
51.39	5	0
46.24	5	0
49.67	10	0
46.64	9	0
54.76	7	0
