# Supplementary material for: A novel 3D visualization method in mice identifies the periportal lamellar complex (PLC) as a key regulator of hepatic ductal and neuronal branching morphogenesis
Source: eLife. 2026 May 7;14:RP108669. doi: 10.7554/eLife.108669 (PMC13152276; doi:10.7554/eLife.108669)
Supplement: Figure 5—figure supplement 1—source data 1. [file elife-108669-fig5-figsupp1-data1.xlsx]

## Sheet: Sheet1
Figure 5-figure supplement 1-source data 3
related to Figure 5-figure supplement 1C: (C) Quantification of the terminal bile duct area on the surface of portal veins with different diameters in control mice. Data are presented as mean ± standard deviation (Mean ± SD). Number of portal veins: control = 20, CCl₄-6 weeks = 18.
Summary Statistics (arithmetic from GraphPad Prism 7)
	X vs. Column A	X vs. Column B
Pearson r
r	0.9195	-0.2676
95% confidence interval	0.8265 to 0.9636	-0.6629 to 0.2445
R squared	0.8454	0.07158
P value
P (two-tailed)	<0.0001	0.2992
P value summary	****	ns
Significant? (alpha = 0.05)	Yes	No
Number of XY Pairs	26	17
Area of BD branches （μm2）	control	CCL4-6w
58.7033	54254.8
43.7617	47548.2
44.005	48946.3
52.1883	51958.8
63.53	27871
47.1033	26674
68.515	49949
54.7483	51652.3
145.088	82841
158.98	92721
83.02	63955
99.1167	77421
91.45	73581
93.0533	61492
87.0017	61474.2
110.903	66817
87.0017	61474.2
110.903	66817
90.5683	78050.5
120.798	77295.1
157.028	78965.4
131.258	77295.1
172.522	105041
167.711	96489.1
185.958	132611
202.46	131718
76.665		128904
69.1917		81684.1
74.69		83941.3
72.108		69736.7
77.6217		81452.4
78.0067		95098.2
61.3017		63855.8
76.0067		109433
86.4517		51195.3
91.9783		86064.1
92.6467		65899.3
130.362		106540
148.248		66041.7
143.907		58666.3
97.9883		116015
194.227		60829.7
218.498		76114.2
