# Supplementary material for: A novel 3D visualization method in mice identifies the periportal lamellar complex (PLC) as a key regulator of hepatic ductal and neuronal branching morphogenesis
Source: eLife. 2026 May 7;14:RP108669. doi: 10.7554/eLife.108669 (PMC13152276; doi:10.7554/eLife.108669)
Supplement: Figure 5—source data 1. [file elife-108669-fig5-data1.xlsx]

## Sheet: Sheet1
Figure 5 - Source Data 1
Figure 5D: Quantification of the distance that bile duct termini extend from portal vein surfaces into hepatic parenchyma in control and CCl₄ 6-week mice, presented as mean ± SD (control n=20, CCl₄ 6-week n=18).
Summary Statistics (arithmetic from GraphPad Prism 7)
Table Analyzed	Data 5
Column B	Data Set-B
vs.	vs.
Column A	Data Set-A
Unpaired t test
P value	<0.0001
P value summary	****
Significantly different (P < 0.05)?	Yes
One- or two-tailed P value?	Two-tailed
t, df	t=17.74, df=36
How big is the difference?
Mean of column A	163
Mean of column B	2.769
Difference between means (B - A) ± SEM	-160.3 ± 9.032
95% confidence interval	-178.6 to -142.0
R squared (eta squared)	0.8974
F test to compare variances
F, DFn, Dfd	9.559, 17, 19
P value	<0.0001
P value summary	****
Significantly different (P < 0.05)?	Yes
Data analyzed
Sample size, column A	18
Sample size, column B	20
i
	PV diameter	CCL4-6w		Control
	130.362	260.54	26.202
	91.9783	184.45	75.7613
	69.1917	146.05	45.2483
	74.69	172.96	45.026
	85.0833	193.28	44.4623
	76.665	141.73	35.5618
	218.498	238.73	86.3471
	194.227	149.14	52.3744
	148.248	153.83	38.5368
	143.907	127.81	77.7966
	72.108	114.35	52.2509
	97.9883	154.56	31.8272
	77.6217	130.74	41.1432
	78.0067	153.52	76.1997
	61.3017	179.9	50.8066
	76.0067	129.56	46.4456
	86.4517	132.99	41.7872
	92.6467	170.56	82.3197
	133.282				0
	83.02				0
	161.122				0
	145.088				55.37
	158.98				0
	172.522				0
	63.53				0
	47.1033				0
	91.8667				0
	68.515				0
	99.1167				0
	91.45				0
	93.0533				0
	129.393				0
	87.0017				0
	110.903				0
	90.5683				0
	131.258				0
	167.711				0
	133.89				0
