# Supplementary material for: A novel 3D visualization method in mice identifies the periportal lamellar complex (PLC) as a key regulator of hepatic ductal and neuronal branching morphogenesis
Source: eLife. 2026 May 7;14:RP108669. doi: 10.7554/eLife.108669 (PMC13152276; doi:10.7554/eLife.108669)
Supplement: Figure 5—source data 2. [file elife-108669-fig5-data2.xlsx]

## Sheet: Sheet1
Figure 5 - Source Data 2
Figure 5F: Quantitative measurement of bile duct termini extension distances along PLC structures into hepatic parenchyma in control, early (CCl₄ 3-week), and late (CCl₄ 6-week) fibrosis mice. Data represent mean ± SD (n=5 per group). Statistical significance determined by one-way ANOVA with Tukey’s multiple comparisons test; *P < 0.05, **P < 0.01, ****P < 0.0001.
Summary Statistics (arithmetic from GraphPad Prism 7)
Table Analyzed	ck19
Data sets analyzed	A-C
ANOVA summary
F	27.77
P value	<0.0001
P value summary	****
Significant diff. among means (P < 0.05)?	Yes
R squared	0.8223
Brown-Forsythe test
F (DFn, DFd)	0.8425 (2, 12)
P value	0.4546
P value summary	ns
Are SDs significantly different (P < 0.05)?	No
Bartlett's test
Bartlett's statistic (corrected)	2.224
P value	0.3289
P value summary	ns
Are SDs significantly different (P < 0.05)?	No
ANOVA table	SS	DF	MS	F (DFn, DFd)	P value
Treatment (between columns)	70710	2	35355	F (2, 12) = 27.77	P<0.0001
Residual (within columns)	15277	12	1273
Total	85987	14
Data summary
Number of treatments (columns)	3
Number of values (total)	15
Number of families	1
Number of comparisons per family	3
Alpha	0.05
Tukey's multiple comparisons test	Mean Diff.	95.00% CI of diff.	Below threshold?	Summary	Adjusted P Value
Control vs. CCL4-3w	-78.48	-138.7 to -18.28	Yes	*	0.0118	A-B
Control vs. CCL4-6w	-168.1	-228.3 to -107.9	Yes	****	<0.0001	A-C
CCL4-3w vs. CCL4-6w	-89.58	-149.8 to -29.37	Yes	**	0.0049	B-C
Test details	Mean 1	Mean 2	Mean Diff.	SE of diff.	n1	n2	q	DF
Control vs. CCL4-3w	64.72	143.2	-78.48	22.57	5	5	4.918	12
Control vs. CCL4-6w	64.72	232.8	-168.1	22.57	5	5	10.53	12
CCL4-3w vs. CCL4-6w	143.2	232.8	-89.58	22.57	5	5	5.614	12
	Control					CCL4-3w					CCL4-6w
26.143	58.233	53.381	59.899
24.055	98.167	93.322	99.269
27.161	38.293	47.16	48.037
47.06	63.794	64.672	63.136
19.123	61.448	60.212	61.837
13.476						121.494	122.657	123.254
18.52						187.576	179.65	184.588
19.146						180.188	182.286	181.967
23.522						79.958	79.436	82.263
35.955						147.6	146.12	149.04
19.44											245.608	246.799	243.393
17.081											163.922	162.435	170.51
19.796											231.664	238.215	239.156
19.012											271.51	267.983	270.854
27.027											244.506	229.105	266.049
