# Supplementary material for: A novel 3D visualization method in mice identifies the periportal lamellar complex (PLC) as a key regulator of hepatic ductal and neuronal branching morphogenesis
Source: eLife. 2026 May 7;14:RP108669. doi: 10.7554/eLife.108669 (PMC13152276; doi:10.7554/eLife.108669)
Supplement: Figure 6—source data 1. [file elife-108669-fig6-data1.xlsx]

## Sheet: Sheet1
Figure 6 - Source Data 2
Figure 6E: Quantification of the distance from sympathetic nerve endings to the hepatic parenchyma along PLC structures in control, early fibrosis (CCl₄-3 weeks), and advanced fibrosis (CCl₄-6 weeks) mice. Data are presented as mean ± standard deviation (Mean ± SD), n=5 per group. Statistical analysis was performed using one-way ANOVA followed by Tukey’s multiple comparison test; *P < 0.05, **P <…
Summary Statistics (arithmetic from GraphPad Prism 7)
Table Analyzed	TH
Data sets analyzed	A-C
ANOVA summary
F	41.05
P value	<0.0001
P value summary	****
Significant diff. among means (P < 0.05)?	Yes
R squared	0.8725
Brown-Forsythe test
F (DFn, DFd)	1.008 (2, 12)
P value	0.394
P value summary	ns
Are SDs significantly different (P < 0.05)?	No
Bartlett's test
Bartlett's statistic (corrected)	4.826
P value	0.0895
P value summary	ns
Are SDs significantly different (P < 0.05)?	No
ANOVA table	SS	DF	MS	F (DFn, DFd)	P value
Treatment (between columns)	37313	2	18657	F (2, 12) = 41.05	P<0.0001
Residual (within columns)	5453	12	454.4
Total	42767	14
Data summary
Number of treatments (columns)	3
Number of values (total)	15
Number of families	1
Number of comparisons per family	3
Alpha	0.05
Tukey's multiple comparisons test	Mean Diff.	95.00% CI of diff.	Below threshold?	Summary	Adjusted P Value
Control vs. CCL4-3w	-63.35	-99.32 to -27.38	Yes	**	0.0014	A-B
Control vs. CCL4-6w	-122.1	-158.1 to -86.17	Yes	****	<0.0001	A-C
CCL4-3w vs. CCL4-6w	-58.79	-94.76 to -22.82	Yes	**	0.0025	B-C
Test details	Mean 1	Mean 2	Mean Diff.	SE of diff.	n1	n2	q	DF
Control vs. CCL4-3w	30.59	93.94	-63.35	13.48	5	5	6.645	12
Control vs. CCL4-6w	30.59	152.7	-122.1	13.48	5	5	12.81	12
CCL4-3w vs. CCL4-6w	93.94	152.7	-58.79	13.48	5	5	6.167	12
	Control					CCL4-3w					CCL4-6w
32.649	23.882	22.68	21.516
48.745	31.709	31.909	35.617
29.226	24.884	20.862	21.773
46.28	59.739	30.472	31.162
23.361	34.836	33.197	34.563
32.429						91.832	73.736	80.46
20.13						146.88	139.436	138.465
32.385						90.471	87.801	90.969
30.738						90.618	88.79	89.794
38.621						67.272	65.288	67.257
27.508											184.193	182.329	172.914
32.54											134.187	134.232	134.477
35.368											148.797	160.482	151.042
22.911											128.9	125.494	126.245
21.002											162.82	175.15	169.65
